## Molecular Phylogenetics of Thecata (Hydrozoa, Cnidaria) Reveals Long-Term Maintenance of Life History Traits despite High Frequency of Recent Character Changes

LUCAS LECLÈRE<sup>1,\*</sup>, PETER SCHUCHERT<sup>2</sup>, CORINNE CRUAUD<sup>3</sup>, ARNAUD COULOUX<sup>3</sup>, AND MICHAEL MANUEL<sup>1</sup>.

<sup>1</sup>Université Paris 06, UMR 7138 CNRS UPMC MNHN IRD, 7 quai St Bernard, Case 05, Batiment A, 4ème étage, 75005 Paris, France; and

<sup>2</sup>Muséum d'histoire naturelle, CP 6434, CH-1211 Genève 6, Switzerland and <sup>3</sup>Genoscope. Centre National de Séquençage. 2, rue Gaston Crémieux, CP5706, 91057 Evry Cedex, France;

\*Correspondence to be sent to: Université Paris 06, UMR 7138 CNRS UPMC MNHN IRD, 7 quai Saint Bernard, Case 05, Bâtiment A, 4ème étage, 75252 Paris Cedex 05, France; E-mail: lucas.leclere@sno.jussieu.fr.

**Abstract.**—Two fundamental life cycle types are recognized among hydrozoan cnidarians, the benthic (generally colonial) polyp stage either producing pelagic sexual medusae or directly releasing gametes elaborated from an attached gonophore. The existence of intermediate forms, with polyps producing simple medusoids, has been classically considered compelling evidence in favor of phyletic gradualism. In order to gain insights about the evolution of hydrozoan life history traits, we inferred phylogenetic relationships of 142 species of Thecata (=Leptothecata, Leptomedusae), the most species-rich hydrozoan group, using 3 different ribosomal RNA markers (16S, 18S, and 28S). In conflict with morphology-derived classifications, most thecate species fell in 2 well-supported clades named here Statocysta and Macrocolonia. We inferred many independent medusa losses among Statocysta. Several instances of secondary regain of medusoids (but not of full medusa) from medusa-less ancestors were supported among Macrocolonia. Furthermore, life cycle character changes were significantly correlated with changes affecting colony shape. For both traits, changes did not reflect graded and progressive loss or gain of complexity. They were concentrated in recent branches, with intermediate character states being relatively short lived at a large evolutionary scale. This punctuational pattern supports the existence of 2 alternative stable evolutionary strategies: simple stolonial colonies with medusae (the ancestral strategy, seen in most Statocysta species) versus large complex colonies with fixed gonophores (the derived strategy, seen in most Macrocolonia species). Hypotheses of species selection are proposed to explain the apparent long-term stability of these life history traits despite a high frequency of character change. Notably, maintenance of the medusa across geological time in Statocysta might be due to higher extinction rates for species that have lost this dispersive stage. [Cnidaria; colony; Dollo's law; gradualism; Hydrozoa; Leptomedusae; Leptothecata; life cycle; phylogeny; punctuated evolution; reverse evolution; Thecata.]

Alternation of morphologically and ecologically divergent life stages, each produced by the previous one through sexual or asexual reproduction, is a common life history strategy in multicellular algae, plants, and fungi, but among animals, it is a rare phenomenon occurring only in Cnidaria and a few derived bilaterian lineages (e.g., cycliophorans, some parasitic flatworms, and some planktonic tunicates; Brusca R.C. and Brusca G.J. 2003). The “typical” life cycle of nonanthozoan cnidarians is indeed unique in comprising a planktonic medusa stage derived from a benthic polyp stage (metagenetic life cycle). In hydrozoans, medusae are issued from asexual buds (gonophores) produced on the body surface of a polyp. The medusa is capable of active swimming due to its bell shape and striated subumbrellar musculature. It grows by feeding on other planktonic animals and releases gametes, leading to the development of planula larvae. These will fix on the bottom and transform into a polyp, generally the founder individual of a polyp colony. According to recent molecular phylogenies (Marques and Collins 2004; Collins et al. 2006), the medusa stage was acquired in a common ancestor of Hydrozoa, Cubozoa, and Scyphozoa (i.e., the medusozoans). However, a large number (about 70%) of hydrozoan species lack the typical metagenetic life cycle, with the pelagic stage either absent (gametes being produced directly by polyps, in gonophores that do not develop into medusae and are thus called “fixed gonophores”) or consisting in somewhat reduced and short-lived medusae called medusoids. Recent cladistic

analyses (Petersen 1990) and molecular phylogenies (e.g., Cunningham and Buss 1993; Govindarajan et al. 2006) have indicated that medusa loss has occurred repeatedly in Hydrozoa, but several important aspects of hydrozoan life cycle evolution remain unexplored.

For example, medusoids have been traditionally considered as intermediate stages of medusa reduction and thereby hydrozoan life cycle evolution has been conceived as a typical instance of phyletic gradualism (see Boero and Sarà 1987), although these assumptions have never been tested explicitly. Medusoids are generally capable of swimming, but they are devoid of a functional mouth opening and often lack other anatomical structures usually found in medusae (e.g., gastrovascular system and tentacles) (Millard 1975; Boero and Sarà 1987; Cornelius 1990; Boero et al. 1997). The various medusoid morphotypes among living hydrozoans range from relatively complex anatomies (approaching full medusae) to very simple ones (more similar to fixed gonophores). Because each of them evokes a particular ontogenetic stage of medusa budding in species with full metagenetic life cycles, they have been interpreted as reflecting successive steps of medusa reduction through paedomorphosis (Boero and Sarà 1987; Boero et al. 1997). However, the existence of phenotypic intermediates does not necessarily imply that shifts between the extreme states follow a gradualistic pattern (see Blackburn 1995, 1998). Under the phyletic gradualism model, a continuum of character states should exist among living species, and clades should contain

species representing primitive (e.g., medusa), intermediate (e.g., medusoid), and advanced (e.g., no pelagic stage) evolutionary stages in paraphyletic arrangement (Blackburn 1995). Therefore, a primary objective of the present study was to test the gradualist hypothesis of hydrozoan life cycle evolution under a phylogenetic framework.

Furthermore, the high number of convergent medusa losses/reductions observed among hydrozoans strongly suggests that getting rid of the pelagic stage is positively selected under some circumstances, leading Cornelius (1990) to underscore a challenging paradox: "if medusa loss is advantageous, and if it can evolve easily, then why have not all recent forms dispensed with the medusa long ago?" To revisit the Cornelius paradox, we should first consider the directionality of character change. A heterodox explanation to the paradox could be that, in addition to being repeatedly lost, medusae can also be frequently regained. That such re-acquisitions from medusa-less ancestors might have taken place at least occasionally has been suggested for the somewhat unusual medusae of *Obelia* (Boero and Bouillon 1987; Boero and Sarà 1987; but this hypothesis was refuted by phylogenetic analyses: Govindarajan et al. 2006) and more recently for the simple medusoids of Plumularioidea (Boero and Bouillon 1989), in this latter case with support from molecular phylogeny (Leclère et al. 2007). However, the frequency and potential impact at the macroevolutionary level of such regains remain to be evaluated. Another pivotal issue regarding the Cornelius paradox is whether or not macroevolutionary forces favoring retention of the medusa are operating above the species level. For example, medusa-less species might undergo higher extinction rates than metagenetic species as a result of lower dispersal capacity. Finally, previous studies (Naumov 1960; Cornelius 1990) have indicated that small annual colonies with a stolonial organization (polyps being directly connected to a creeping stolon) tend to release medusae, whereas larger perennial colonies with relatively complex branching patterns generally lack a pelagic stage. This observation suggests that the 2 extreme types of life cycles might indeed represent aspects of 2 more generally different ecological strategies, but this correlation between life cycle and colony architecture characters remains to be tested phylogenetically.

We chose Thecata (=Leptothecata, Leptomedusae), a subclade of Hydrozoa, as a model taxon to investigate the evolution of hydrozoan life history traits. Thecata includes more than half of all known extant hydrozoan species (with almost 2000 species and 32 families), is present in all marine environments worldwide, and comprises the greatest diversity of life cycles (including species with medusoids of various types) and of colony architecture found among hydrozoans. Unlike the polyps of other hydrozoans, Thecata polyps are surrounded and protected by a chitinous exoskeleton called a theca, and Thecata medusae have their mature gametes located under the radial canals. Thecata

colonies usually present a zooid polymorphism with specialization of polyps according to their function, that is, gastrozooid (nutrition), gonozooid (reproduction), and dactylozooid (defense of the colony). The 2 first polyp types are present in almost all species of thecate groups (Plumularioidea, *Hydrodendron*, and some species within Campanulinidae and Lafoeidae).

As is the case for other hydrozoan groups, the thecates have a confused taxonomic history with current morphology-based classifications resulting from a compromise between earlier separate polyp- and medusa-based systems (Naumov 1960; Bouillon 1985; Petersen 1990; Bouillon et al. 2006). Indeed, until the second part of the 20th century, 2 classification systems coexisted, with 2 names for the 2 parts of the life cycle, 1 for the polyp (classification based on the thecae and the colony shape) and 1 for the medusae (classification based on the medusae sense organs). A high level of incongruence between these 2 systems rendered the synthesis particularly difficult owing to different patterns and rates of character evolution between both semaphoronts (a phenomenon previously called "mosaic evolution" or "inconsistent evolution;" Morton 1957; Boero and Bouillon 1987). A united classification can now be elaborated with molecular characters as a data source independent from polyp and medusa morphology, and this is one of the desired outcomes of this study.

We analyzed evolutionary patterns of life cycle and colony shape characters in Thecata on a phylogeny reconstructed from 3 different molecular markers (16S ribosomal RNA [rRNA], 18S rRNA, and 28S rRNA) for 119 species. The well-resolved phylogeny enabled us to reconstruct the evolution of life cycle and colony architecture and to examine correlations between these characters. We demonstrate that the evolution of these life history traits does not follow a phyletic gradualism model. We show that life cycle and colony shape character changes are correlated and that they determine 2 alternative evolutionary stable strategies. Based on these findings, we propose an explanation for the Cornelius paradox invoking species selection.

## MATERIAL AND METHODS

### *Taxonomic Sampling*

The total number of sampled species of Thecata is 142, supplemented by 16 nonthecate outgroup species. We generated new sequences from 92 thecate samples; 9 new sequences from the CnidToL project were provided by P. Cartwright. Additional sequences were retrieved from the following previous studies: Leclère et al. (2007) for 16S rRNA, Collins et al. (2006) for 28S and 18S rRNA, and Govindarajan et al. (2006) for 16S and 18S rRNA (see Appendix 1). The newly sequenced specimens were collected and identified to the species level by PS, usually with voucher samples deposited in the Museum of Natural History of Geneva (Switzerland).

We estimated the representativeness of the ingroup taxonomic sampling with respect to the known taxonomic and morphological diversity of Thecata (Bouillon et al. 2006). The sampled species represent 22 of 32 currently recognized families. All thecate families that comprise more than 10 species are sampled in the present study, with the exception of Syntheciidae. Species with a pelagic stage in their life cycle are slightly over-represented, with 28.2% (33 sp.), 9.4% (11 sp.), and 62.3% (73 sp.) of our species sampling having, respectively, a cycle with medusa, with medusoid, or without a pelagic phase, compared with the estimated proportions of 17.8% (346 sp.), 2.2% (44 sp.), and 79.9% (1550 sp.) for all described species of Thecata (Bouillon et al. 2006). The main weakness of our taxonomic sampling is the under-representation of Lafoeidae (only 1 species sampled, *Lafoea dumosa*) and Syntheciidae (no species sampled), 2 families that comprise only species with fixed gonophores.

The 16 outgroup species comprise 11 nonthecate species of Hydroidolina and 5 species belonging to Trachylina, the latter being included only in 18S and 28S rRNA analyses but not in the 16S rRNA analyses to avoid topological artefacts due to extreme sequence divergence of the trachylines for this marker (Leclère et al. 2007).

### Sequencing

Total genomic DNA was extracted using the cetyl trimethylammonium bromide method (Coffroth et al. 1992). The primers used for 16S amplification are described in Cunningham and Buss (1993). 18S primers are the same as used in Govindarajan et al. (2006) (18SFb 5'GCTGTATGTACTGTGAAACTGCG3'; 18SRb 5'CACCTACGGAAACCTTGTTACGAC3'). Two partial 28S rRNA fragments of about 2000 bp each were amplified using, respectively (F10, R2077) and (F1379, R3264) as primer sets (F10: 5'TCCCCTAGTAAACGGCGAGTG-AAGCG3'; other primers are from Medina et al. 2001).

Polymerase chain reactions (PCRs) were performed in a total volume of 50  $\mu$ l with 5  $\mu$ l 10  $\times$  PCR buffer (Bioline, London, UK), 0.3  $\mu$ l BioTaq polymerase (Bioline, London, UK), 1  $\mu$ l 10 mM deoxyribonucleotide, 1.5  $\mu$ l 50 mM MgCl<sub>2</sub>, 1  $\mu$ l 10  $\mu$ M forward primer, and 1  $\mu$ l 10  $\mu$ M reverse primer. PCR cycles comprised an initial denaturation step at 94°C for 2 min followed by 30 cycles of 1 min at 94°C, 1 min at the annealing temperature, and 3 min at 72°C. There was then a final extension for 10 min at 72°C. Annealing temperatures were 47°C for 16S rRNA amplification, 55°C for 18S rRNA amplification, and 63°C for 28S rRNA amplifications.

Sequencing was done at the Genoscope (the French National Sequencing Centre, Evry, France) with the primers used for PCR amplification. To complete the sequencing of the 18S PCR fragment, 2 internal primers were designed (18SR1028:5'CTGCGAAAGCATTGCCAAG3' and 18SF970:5'CTAGGACGGTATCTGATCGTCTTCG3'). Likewise, 28S sequences were obtained by using the F780, F1379, and R1379 internal primers for the

first fragment and the F2077, F2800, and R2800 internal primers for the second fragment (F780: 5'ACCCGTCTTGAAACACGGACCAAGG3'; R1379: 5'CCATGGCCACCGTCTGCTGTC3'; F2077: 5'AACTTCGGGAAAAGGATTGGCTC3'); other primers are from Medina et al. 2001 and Voigt et al. 2004). 18S and 28S rRNA sequences from *Clytia hemisphaerica* were retrieved from expressed sequence tag sequence data available for this species. Forward and reverse sequences were assembled in BioEdit (Hall 1999).

### Alignment and Combination of Data Sets

The different data sets (16S, 18S, and 28S) were aligned independently with the software MUSCLE (Edgar 2004) under default parameters. Final positional homology was derived by visual adjustment in BioEdit with reference to secondary structure models available for *Hydra circumcincta* 18S rRNA (Medina et al. 2001, AF358080), *Hydra vulgaris* 16S rRNA (Pont-Kingdon et al. 2000, AF100773), and *Saccharomyces cerevisiae* 28S rRNA (comparative RNA Web site <http://www.rna.icmb.utexas.edu>, Cannone et al. 2002). Optimal secondary structures for the most highly variable positions were calculated using MFold v3.0 under default parameters (Zuker 2003; <http://frontend.bioinfo.rpi.edu/applications/mfold/cgi-bin/rna-form1-2.3.cgi>). Non-alignable loops were removed from the alignments.

Positions containing more than 33% of gaps and/or missing data were deleted. Based on preliminary (not shown) analyses of the data set, we defined empirically this value as a reasonable compromise for eliminating parts of the alignment where primary homology is doubtful, but at the same time minimizing data loss. Excluding all sites with a single gap (or missing data) results in losing a large amount of data because very few positions (less than 32%) have no gap or missing data. Conversely, keeping all positions would have the inconvenient to include a number of highly ambiguous alignment regions (especially in the 28S data set).

To avoid the existence of pairs of taxa with no data in common, species represented by only 1 of the 3 markers were not included in the combined data set (these are indicated by an asterisk in the separate analyses, Figs. 1 and 2, Supplementary Fig. 1 [available from <http://www.oxfordjournals.org/ourjournals/sysbio/>]). Indeed, our preliminary analyses indicated that pairs of taxa with no data in common tend to be attracted in the combined maximum likelihood (ML) tree. When a single species was represented by several sequenced samples in separate analyses forming a monophyletic group, only 1 (randomly chosen) sequence was retained for combined analyses. All sequence data sets have been deposited in TreeBASE (Study accession number S2436; Matrix accession number M4625-M4628). The number of sampled species in the combined (16S + 18S + 28S rRNA) alignment is 135 (including 119 species of Thecata and 16 outgroup species).



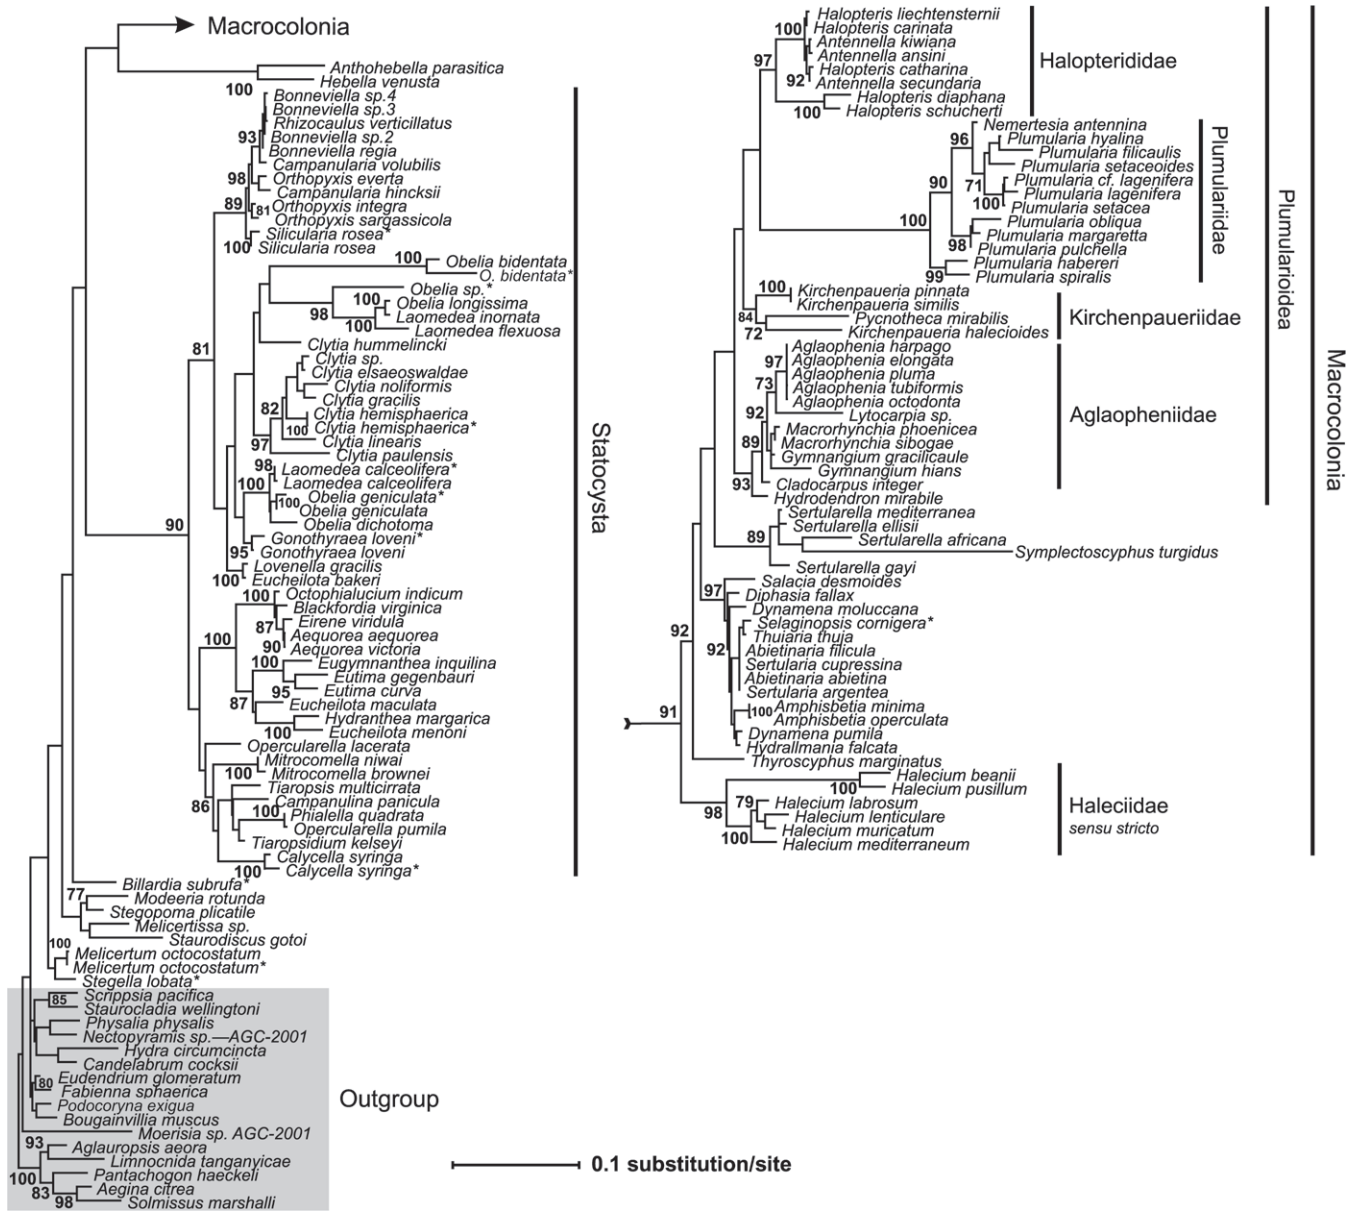

FIGURE 1. Phylogram of the ML analysis of 18S rRNA sequences under the GTR + G + I model. ML bootstrap values higher than 70% (500 bootstrap replicates) are indicated above or below branches (according to space available). Asterisks indicate sequences that were not included in the combined data set. Names of monophyletic higher level taxa comprising more than 3 samples are indicated.

### Phylogenetic Analyses

Each data set was analyzed by maximum parsimony (MP), ML, and Bayesian inference. Details on analyzed data sets and estimated parameters and models are summarized in Table 1. The PhyML (Guignon and Gascuel 2003) program was used for ML analyses. Models of nucleotide evolution for 16S, 18S, and 28S rRNA and combined data sets were selected using the Akaike information criterion in the MrModelTest v.2 program (Nylander 2004). Among-site rate variation was estimated using a discrete approximation to the gamma distribution with 8 rate categories. The starting trees were BioNJ trees. MP analyses were performed using

PAUP 4.1 (Swofford 1998). All characters were treated as equally weighted and unordered and gaps were treated as missing data. Heuristic analyses were performed with 500 random addition sequences of taxa and the TBR algorithm for branch swapping. Branch robustness in the MP and ML trees was estimated by bootstrapping (Felsenstein 1985) with 500 replicates (10 random addition sequences for each MP bootstrap replicate).

Bayesian analyses of the combined data set were performed using MrBayes 3.0b4 (Ronquist and Huelsenbeck 2003) using either a simple GTR + G + I model or partitioned (GTR + G + I) models for each marker (16S, 18S, and 28S rRNA). For each data set, 3 searches were run

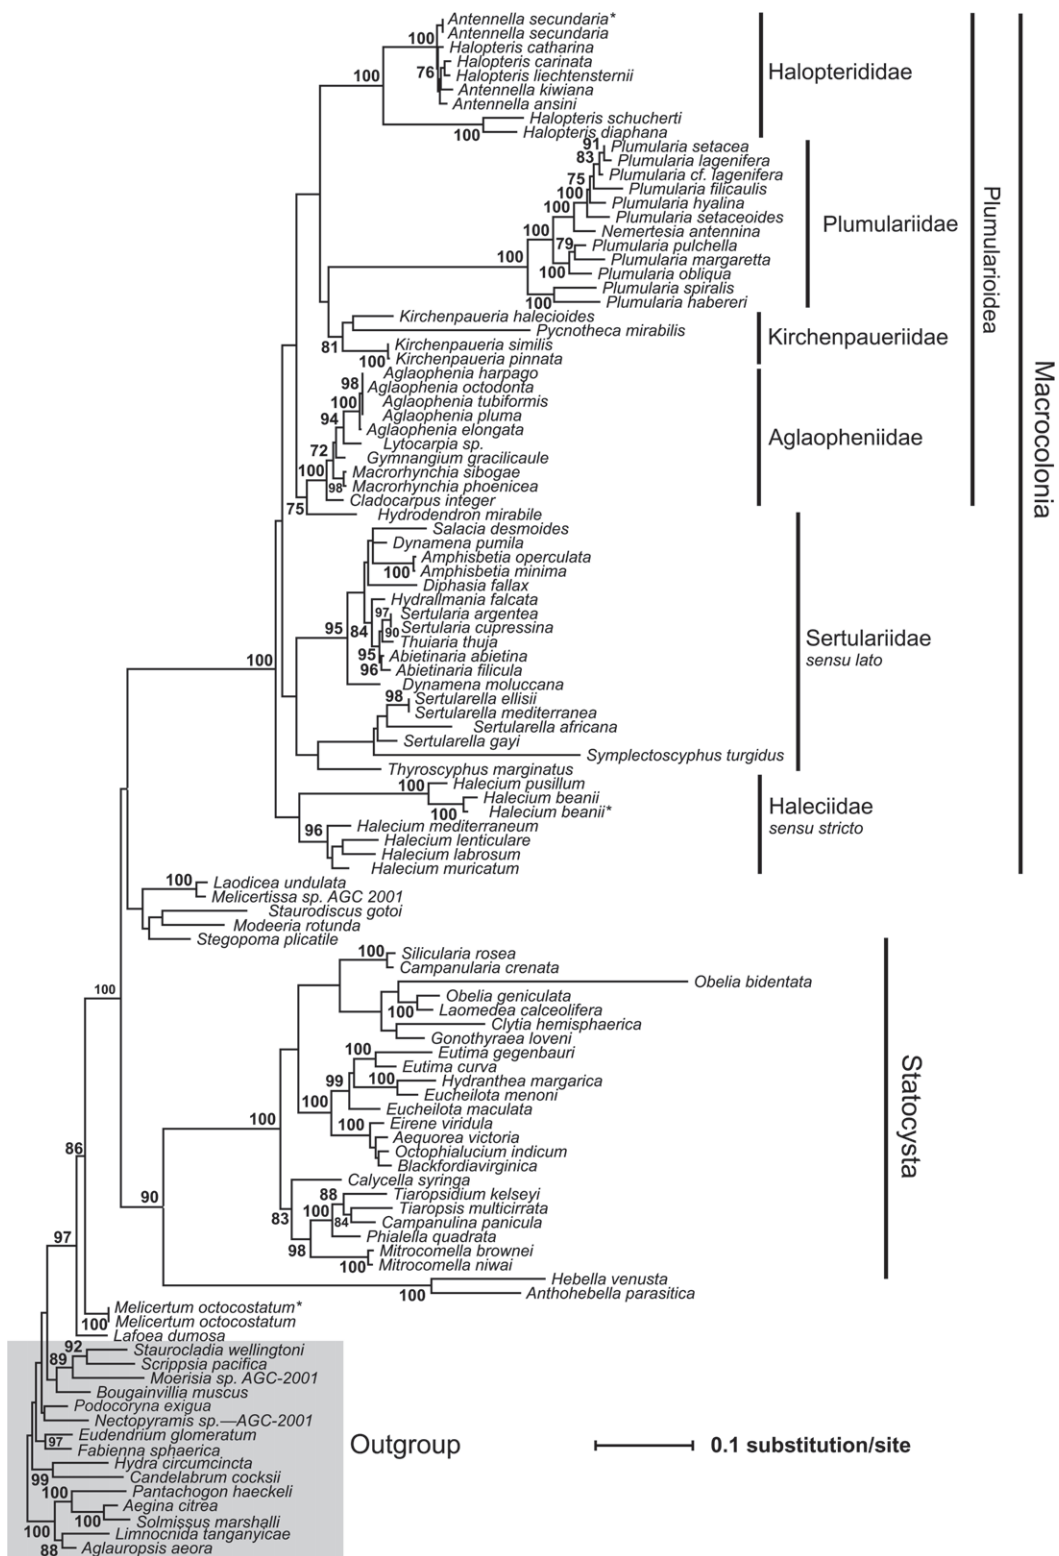

Downloaded from https://academic.oup.com/sysbio/article/58/5/509/1635824 by guest on 25 April 2024

FIGURE 2. Phylogram of the ML analysis of 28S rRNA sequences under the GTR + G + I model. ML bootstrap values higher than 70% (500 bootstrap replicates) are indicated above or below branches (according to space available). Asterisks indicate sequences that were not included in the combined data set. Names of monophyletic higher level taxa comprising more than 3 samples are indicated.

TABLE 1. Information about data sets and analysis parameters, with proportion of invariant positions and  $\alpha$  parameter of the Gamma distribution from ML analyses

|                                  | 16S         | 18S         | 28S         | Combined    | Combined without <i>Symplectoscyphus tugidus</i> |
|----------------------------------|-------------|-------------|-------------|-------------|--------------------------------------------------|
| Number of terminal taxa          | 149         | 144         | 109         | 135         | 134                                              |
| Number of characters             | 488         | 1645        | 3074        | 5207        | 5207                                             |
| Variable characters              | 319         | 711         | 1273        | 2257        | 2227                                             |
| Parsimony informative characters | 284         | 509         | 1027        | 1802        | 1791                                             |
| % Guanine + Cytosine             | 32          | 47          | 48          | 47          | 47                                               |
| Tree length (MP)                 | 3155        | 4010        | 9831        | 16 549      | 16137                                            |
| Number of minimal trees (MP)     | 14149       | 40526       | 2215        | 24          | 8                                                |
| MrModelTest model                | GTR + G + I | GTR + G + I | GTR + G + I | GTR + G + I | GTR + G + I                                      |
| Proportion invariant             | 0.114       | 0.328       | 0.414       | 0.173       | 0.175                                            |
| $\alpha$ parameter               | 0.340       | 0.352       | 0.369       | 0.250       | 0.247                                            |
| -Ln likelihood                   | -14311.6    | -22703.1    | -47818.2    | -83988.8    | -82391.0                                         |

for 2 million generations and trees were sampled every 100 generations. We estimated convergence for each search by checking stasis of the “average standard deviation in partition frequency values across independent analyses” (with a threshold value of 0.03) and by checking stasis of the likelihood values (using the “sump” command). For all searches, convergence was already reached at 1,000,000 generations. Posterior probabilities were estimated by constructing a majority rule consensus of 1000 trees, sampled every 1000 generations from 1,000,000 to 2,000,000 generations. Finally, the consensus trees of the 3 searches were compared with check that they converged on the same topology.

Some alternative topological hypotheses were tested. Their likelihoods, obtained by constraining the ML analysis for each alternative hypothesis of interest (using

PAUP, see Table 2), were compared with the likelihood of the best ML tree by the approximately unbiased (AU) test (Shimodaira 2002), using CONSEL (Shimodaira and Hasegawa 2001). Constrained analyses were also done using MP in PAUP to estimate differences in parsimony score between the best MP trees and the best trees obtained under particular topological constraints (Table 2).

#### Optimization of Morphological Characters on Molecular Trees

For character reconstruction, life cycle and colony shape characters were coded as multistate with the following character states: colony shape: “stolonial,” “erect unbranched,” “erect and branched;” type of life cycle: “with medusa,” “with medusoid,” “with fixed gonophore.” The influence of character coding was checked by recoding these characters as binary (“presence/absence of fixed gonophore,” “presence/absence of medusoid,” etc.). This gave the same pattern of character changes as with multistate coding (not shown). For character correlation tests (see below), these unordered multistate characters were transformed into binary characters by combining states “erect unbranched” and “erect and branched” into “erect (branched or not)” and states “medusa” and “medusoid” into “presence of a pelagic sexual stage”. Other morphological features of the polyp and medusa were coded as binary characters: dactylozoid (defensive polyp type)—present or absent, statocyst (gravitation sense organ of the medusae)—present or absent; thecae (chitinous cups surrounding the polyps)—present or absent; position of mature gametes in the medusa—on the radial canals or on the manubrium.

Parsimony and ML reconstructions of morphological character evolution and reweighting of character transformations were done with Mesquite (Maddison WP and Maddison DR 2009) on the tree resulting from the ML analysis of the combined data set (16S + 28S + 18S rRNA) recomputed after removal of *Symplectoscyphus tugidus*. Preliminary analyses indicated that excluding this long-branched species significantly increases support values of Plumulariida (Sertulariidae + Plumularioidae), Sertulariidae and (*Sertularella* + *Thyrosocyphus*)

TABLE 2. Results of topological constraints using MP and hypothesis testing using the AU test

|                                                                   | Steps | P AU test |
|-------------------------------------------------------------------|-------|-----------|
| (a) Groups that share the same life cycle                         |       |           |
| <i>Campanularia</i> (FG)                                          | 11    | 0.025     |
| Lafoea + Macrocolonia (FG)                                        | 54    | <0.01     |
| Medusoids of the Macrocolonia (MD)                                | 603   | <0.01     |
| <i>Eugymanthea</i> + <i>Hydranthea</i> (MD)                       | 38    | <0.01     |
| <i>Laomedea</i> (FG)                                              | 129   | <0.01     |
| <i>Opercularella</i> + <i>Calycella</i> + <i>Campanulina</i> (FG) | 102   | <0.01     |
| (b) Taxonomic groups                                              |       |           |
| Plumularioidae without <i>Hydrodendron</i>                        | 10    | 0.49      |
| Campanulariidae                                                   | 44    | <0.01     |
| Bonneviellidae                                                    | 2     | 0.37      |
| Lovenellidae                                                      | 38    | <0.01     |
| Eirenidae                                                         | 72    | <0.01     |
| Campanulinidae                                                    | 102   | <0.01     |
| Mitricomidae                                                      | 44    | <0.01     |
| Hebellidae                                                        | 13    | 0.27      |
| Conica                                                            | 258   | <0.01     |
| Proboscoida                                                       | 5     | 0.18      |

Note: “Steps” is the difference in number of steps between the best unconstrained MP tree and the best MP tree under constraint.  $P < 0.05$  indicates rejection of the monophyly of the hypothetical clade under the AU test. In (a), we tested for the monophyly of a number of groupings that share the same life cycle type and are para- or polyphyletic in the ML analyses (Figs. 1–3) but without being very distantly related. In all cases, monophyly was rejected, thus supporting a maximal number of FG and MD acquisitions. In (b), we tested for the monophyly of some recognized taxonomic groups that were not monophyletic in the ML analyses (Figs. 1–3). FG = fixed gonophore; MD = medusoid.



clades, without affecting topology and support in the rest of the tree. Prior to ML reconstruction, the molecular tree was ultrametrized (after exclusion of *Trachylina* species), using the command “ultrametrize” in Mesquite. Both the MK1 (“Markov  $k$  state 1 parameter model”) and the AssymmMK (“Asymmetrical Markov  $k$  state 2 parameter model”) models were used for ML reconstruction.

Bias in character changes in favor of recent events were estimated by comparing the number of events in terminal versus internal branches. Correlation between life cycle and colony form character changes (using binary recoding of the characters—see above) was estimated using 2 methods: (i) Pagel’s (1994) ML test for association among discrete variables, as implemented in Mesquite. This method estimates transition rates from the data and uses a probabilistic model for inferring the likelihood of joint changes between 2 characters versus a model of independent evolution. The test was done on the ultrametrized combined ML tree (without *S. turgidus*). The  $P$  value was estimated from 1000 simulations. (ii) Bayesian approach to correlation of characters as implemented in BayesDiscrete (Pagel and Meade 2006) available through Pagel’s BayesTraits software (<http://www.evolution.rdg.ac.uk/>). This method takes into account phylogenetic uncertainty in reconstructing ancestral characters by examining characters over a posterior distribution of trees rather than just on a single consensus tree. The test was done using trees from the Bayesian analysis of the combined data set without *S. turgidus* and the partitioned model.

## RESULTS

### *Levels of Resolution in the Separate and Combined Analyses*

Levels of phylogenetic resolution in the ML analyses differed greatly between 16S and 28S/18S rRNA trees. In the 16S rRNA tree (Supplementary Fig. 1), Thecata is not monophyletic probably due to a long-branch attraction between Plumularioidea and the outgroup. As found in previous studies (Leclère et al. 2007; Moura et al. 2008), substitution rates in the 16S rRNA sequences are much higher within Plumularioidea than in other hydrozoans. Although internal nodes of Plumularioidea are well resolved in this 16S rRNA analysis (as in Leclère et al. 2007), for the rest of Thecata only a few external nodes are significantly supported. In contrast, the 18S and 28S rRNA analyses retrieved a well-supported Thecata clade and resolved many internal nodes with high statistical support (Figs. 1 and 2). The topologies resulting from 18S (Fig. 1) and 28S (Fig. 2) rRNA analyses are mostly congruent. There are nevertheless some significant differences including the paraphyly of Sertulariidae and the phylogenetic position of Hebellidae, Tiarannidae, and Laodiceidae species. Topologies resulting from the combined analyses of the 3 markers are very similar to those obtained through separate analyses of the 28S rRNA data set, with a high degree of resolution of internal relationships within Thecata.

### *Relationships among Thecate Hydrozoans*

Monophyly of Thecata is strongly supported in all analyses, except when using 16S rRNA data alone. Most thecate species fall within 2 main clades (Figs. 1–3) which we call, respectively, Macrocolonia (from the large size of their colonies) and Statocysta (from their main synapomorphy, acquisition of gravitation sense organ, or statocysts, in the medusa). Macrocolonia comprises notably Plumularioidea and Haleciidae, and Statocysta includes Campanulariidae and Mitricomidae among other families (Fig. 3). A minority of species, belonging to the families Melicertidae, Tiaranidae, Laodiceidae, Hebellidae, and Lafoeidae, are positioned outside these 2 major clades. The classical subdivision of Thecata into Conica (Campanulariidae and Bonneviellidae) and Proboscoida (the rest of Thecata, see Bouillon 1984, 1985), based on the morphology of the oral region of the polyp, is clearly contradicted by our molecular analyses, as indicated by bootstrap values and phylogenetic tests (Table 2). In order to update the classification of Thecata, we propose here to phylogenetically define Macrocolonia as the least inclusive clade containing *Plumularia setacea*, *Dynamena pumila*, and *Halecium muricatum* and Statocysta as the least inclusive clade containing *C. hemisphaerica*, *Aequorea aequorea*, and *Phialella quadrata* (node-based definitions).

Within Macrocolonia, most of the recognized families (Bouillon et al. 2006) are monophyletic. The only unconventional results are *Hydrodendron mirabile* as the sister group of Aglaopheniidae, whereas it has previously been classified in Haleciidae, and the nesting of *Thyroscyphus marginatus* (Thyroscyphidae) within Sertulariidae in all analyses. The taxonomic position of Thyroscyphidae has been unclear—some authors (e.g., Bouillon et al. 2006) treat it as a separate family, whereas others include it in Sertulariidae (e.g., Millard 1975), consistent with our results.

We are confronted with a radically different situation within Statocysta because all families with at least 2 species sampled are para- or polyphyletic (with significant support from AU test—see Table 2), apart from Aequoreidae and Bonneviellidae. That the incongruence between the traditional taxonomy and our phylogenetic results is higher for Statocysta than Macrocolonia probably has to do with the prevalence of metagenetic life cycles in Statocysta, and with the long history of separate medusa and polyp-based classifications. Indeed, in Macrocolonia, the existence of the polyp stage but not of the medusa stage has made the classification easier to construct, and the relatively complex colonial organization has provided more taxonomic characters than with the medusae and simple colonies of Statocysta.

### *Evolution of Medusa Characters*

A medusa must have been present in the ancestral life cycle of Thecata (Fig. 4). We infer 4 unambiguous simplifications (medusa transformed into a medusoid) and 13 complete losses of the pelagic stage (gametes produced

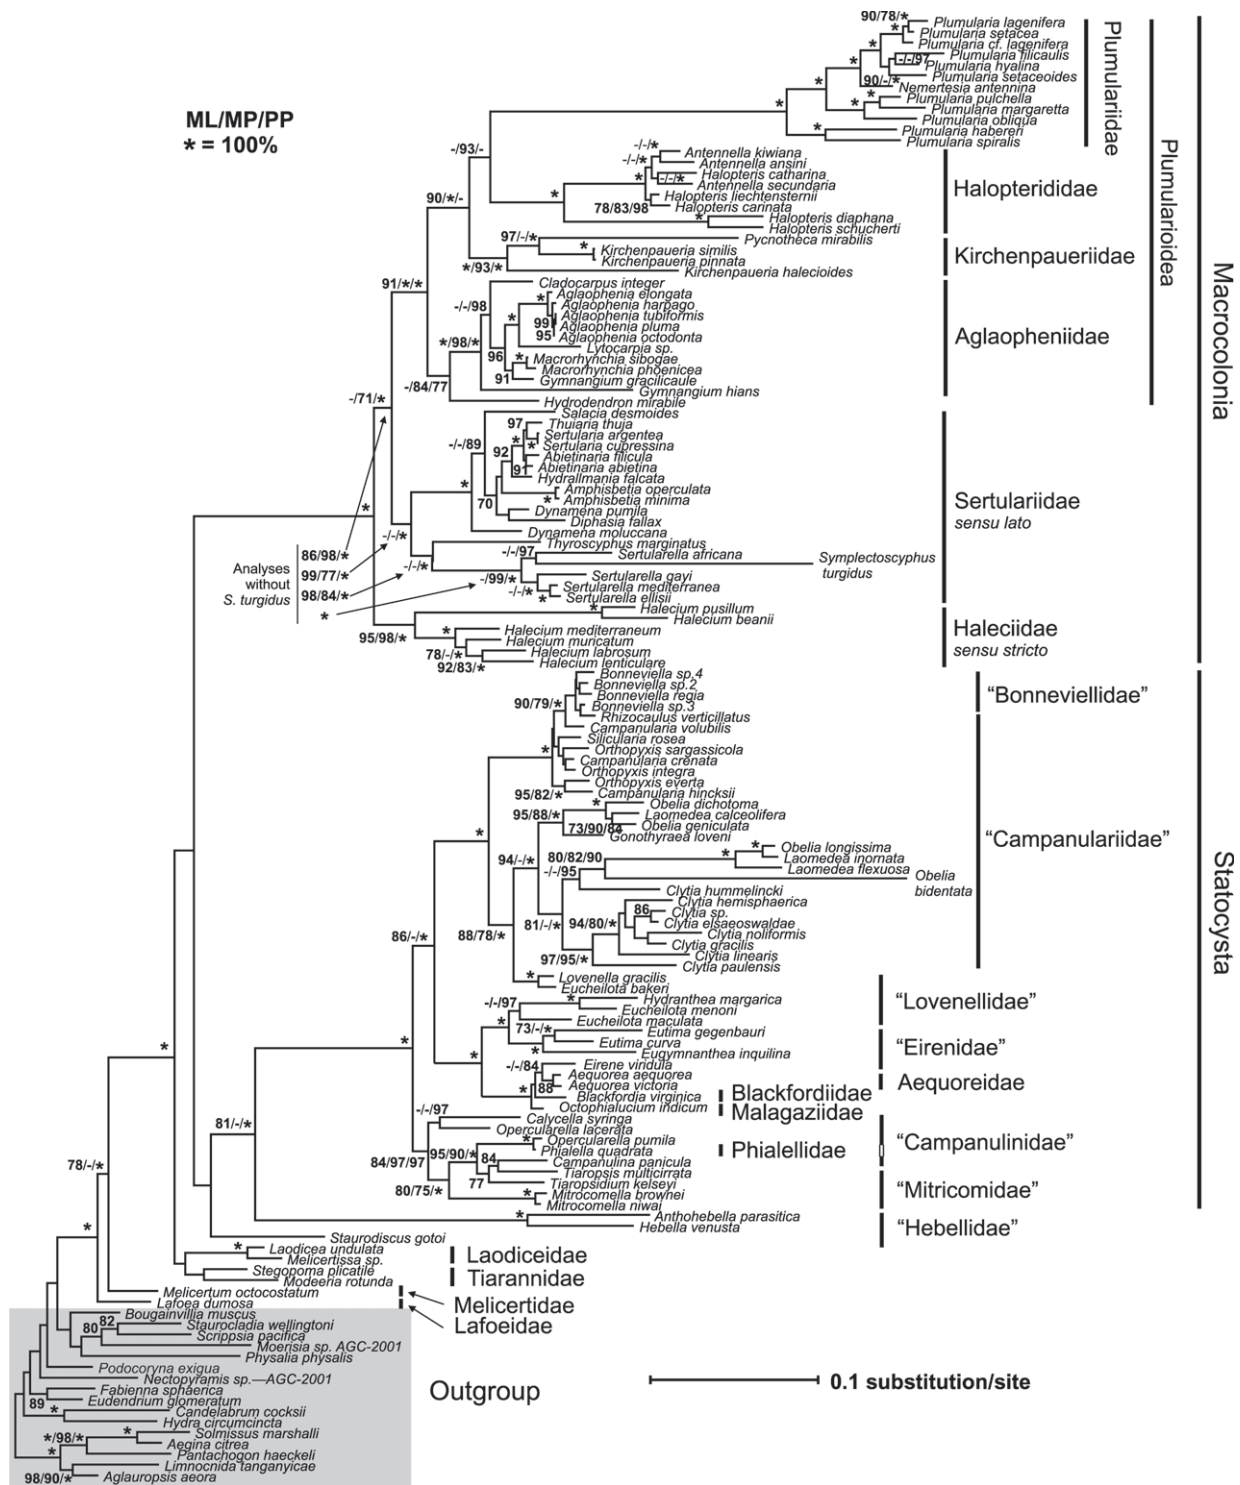

FIGURE 3. Phylogram of the ML analysis of the combined (16S + 18S + 28S rRNA) data set under the GTR + G + I model. ML bootstraps (left value), MP bootstraps (middle value), and Bayesian posterior probabilities (PP, right value) higher than 70% are indicated above or below branches (according to space available). These values are replaced by an asterisk when maximal (100%) and an asterisk alone means that all 3 values are maximal. In a few cases, only ML bootstrap values are shown because of lack of space. Supraspecific taxa are indicated by vertical lines. Note that Haleciidae sensu stricto correspond to Haleciidae without the genus *Hydrodendron*; Sertulariidae sensu lato include *Thyroscyphus marginatus*, sometimes classified in a separate family Thyroscyphidae (e.g., Bouillon et al. 2006) but classified by others as members of the Sertulariidae (e.g., Millard 1975).



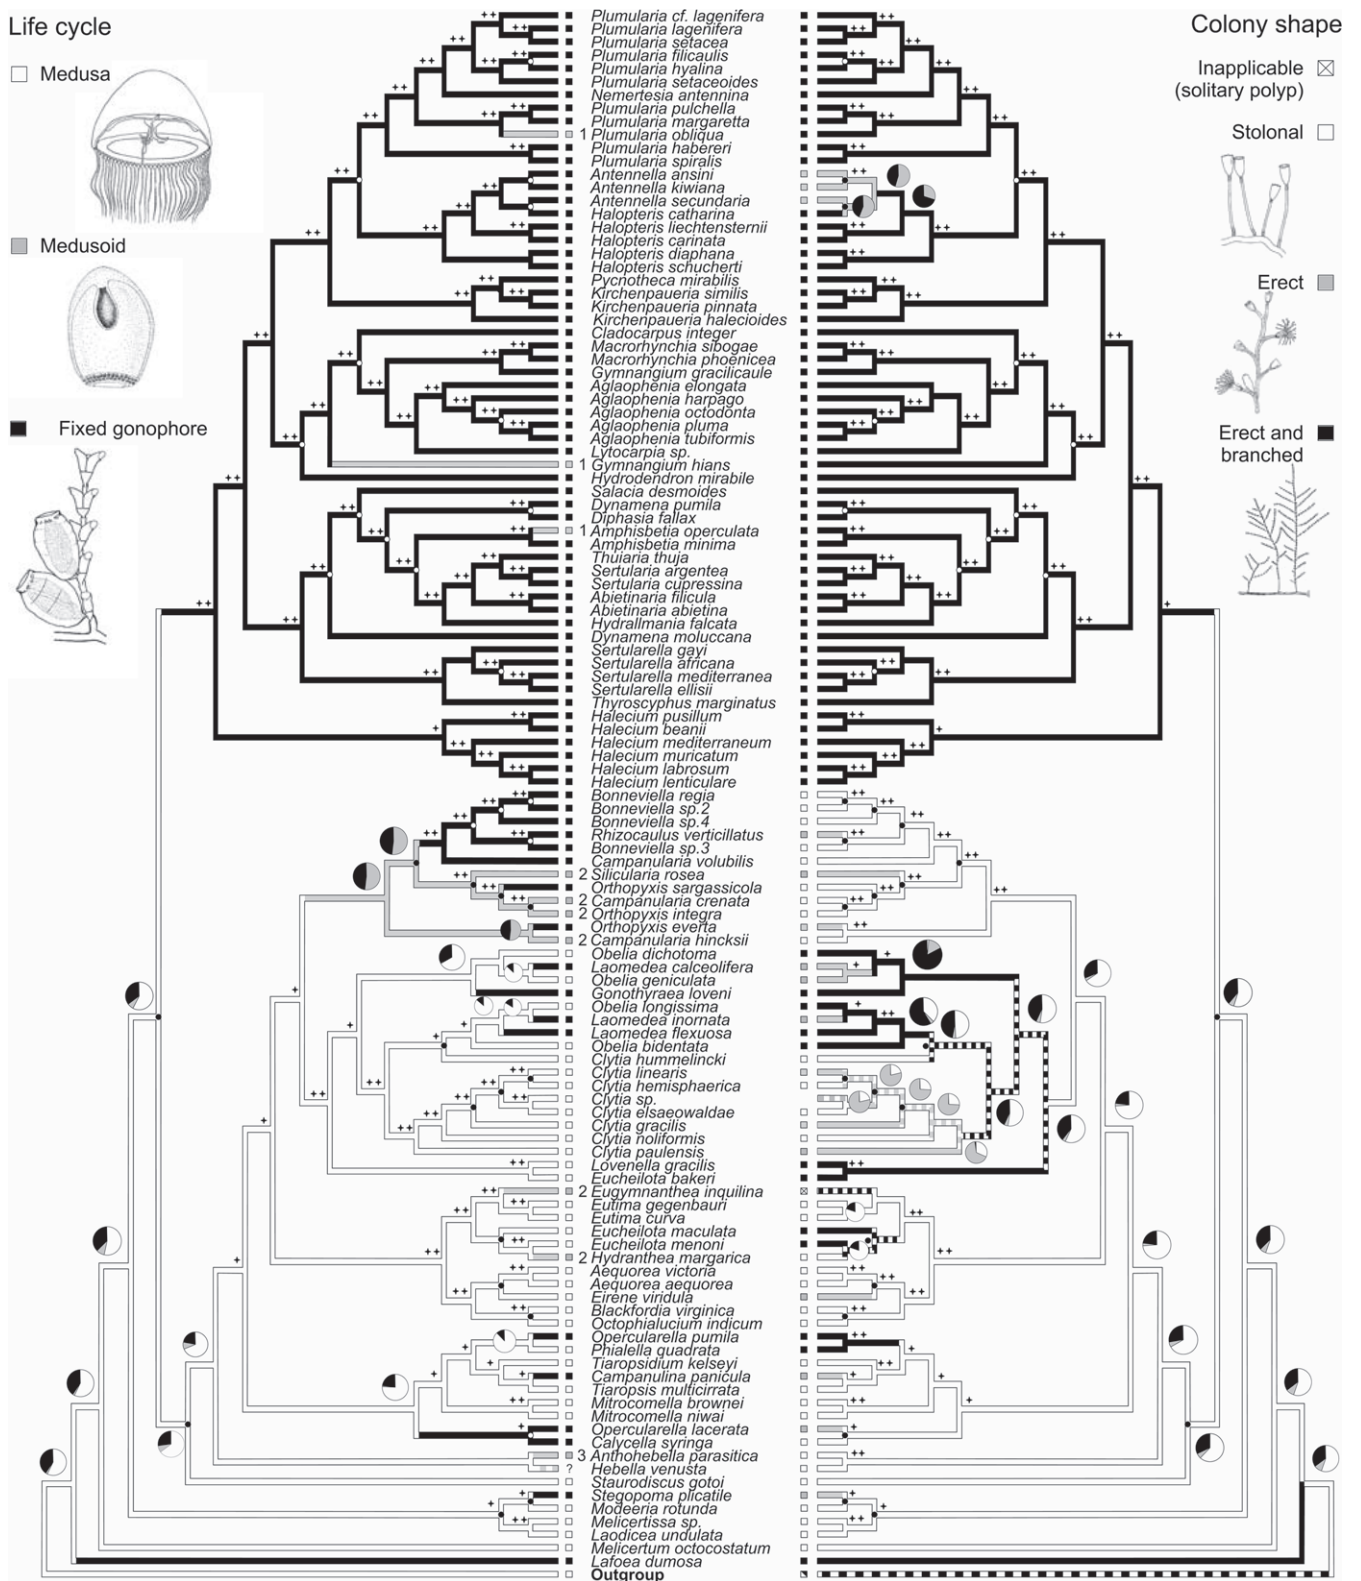

FIGURE 4. MP and ML ancestral character state reconstructions on the topology resulting from the ML analysis of the combined data set (tree in Fig. 3) for characters of the life cycle (left side) and of colony shape (right side). Nodes with less than 70% of ML bootstrap are indicated by a dot on the node. The MP reconstruction was unweighted and unordered, with ACCTRAN optimization. Branches labeled with vertical lines correspond to unknown character states. Plus indicate support from ML character reconstruction (Mk1 model) to the character state obtained by the MP analysis on the considered branch (a single plus: probability >90% and 2 plus: probability >95%). (Continued next page)

by fixed gonophores). These scenarios are supported by unweighted parsimony and by the statistically supported polyphyly of groups with fixed gonophore or with medusoid (Table 2). The medusoid morphology is supported as an evolutionary intermediate between full medusa and absence of a pelagic stage in only 1 case (in the Bonneviellidae + Campanulariidae clade), but in all other instances among Statocysta, events of medusa reduction or loss are independent from each other.

Macrocolonia is characterized by an ancient loss of the pelagic stage in its ancestor. Within this clade, we infer 3 gains of medusoids from a plesiomorphic medusa less condition (Fig. 4), in 3 families: Aglaopheniidae (*Gymnagium hians*), Plumulariidae (*Plumularia obliqua*), and Sertulariidae (*Amphisbetia operculata*) (see Motz-Kossowska 1907; Tessier 1922; Bourmaud and Gravier-Bonnet 2004). According to the AssymMK model, gains have to be weighted at least 86 times more than losses to lose statistical support in favor of medusoid regains. In the MP reconstruction, gains are suppressed with a weight of gains at least 6 times higher than the weight of losses, and this implies at least 10 additional losses of the medusa within Macrocolonia with the 70% bootstrap ML tree (soft polytomy) and 13 with the unmodified ML tree. MP and ML estimates of the number and rate of loss and regains for medusae are summarized in Table 3.

The vast majority of the character transformations affecting life cycle evolution are concentrated in the terminal branches of the tree (Fig. 4). This holds true for medusa losses (10/13) as well as for medusa simplifications (3/4) and regains of medusoids (3/3).

Two types of medusae, anthomedusae, and leptomedusae are traditionally recognized in Hydrozoa, the latter type being considered characteristic for Thecata. Although anthomedusae have their mature gametes located on the manubrium (the stomach) and lack equilibration organs (statocysts), leptomedusae typically bear mature gametes along the radial canals and possess statocysts (Bouillon et al. 2006). The few instances of leptomedusae lacking statocysts have been considered derived (Bouillon 1984, 1985). Our optimizations place the transition of mature gametes localization (from the manubrium to the radial canals) in the common branch of Thecata (see Supplementary Fig. 2a), but this reconstruction is obtained only under ACCTRAN optimization because of the placement of *L. dumosa*, a species without medusa, as sister to the rest of Thecata. In addition, the localization of mature gametes reverted to a position on the manubrium in the medusoids of *Anthohebella parasitica* and *Hydranthea margarica*.

TABLE 3. MP and ML estimates of the number and rate of loss and regains for medusae

| Rate        | Estimated parameter                                     | ML tree |                 | 70% bp ML tree |
|-------------|---------------------------------------------------------|---------|-----------------|----------------|
|             |                                                         | MP      | ML              | MP             |
| Loss = gain | Number of losses <sup>a</sup>                           | 13      | 5               | 12             |
|             | Number of medusa simplifications <sup>a</sup>           | 4       | 4               | 4              |
|             | Number of regains <sup>a</sup>                          | 3       | 3               | 3              |
|             | Rate of gain or loss                                    | —       | 3.79            | —              |
| Loss ≠ gain | Rate of loss ( $\alpha$ )                               | —       | 4.22            | —              |
|             | Rate of gain ( $\beta$ )                                | —       | 3.38            | —              |
|             | Number of loss if no regain                             | 27      | —               | 22             |
|             | Minimum ratio $\alpha/\beta$ to allow for medusa regain | 1.7     | 26 <sup>b</sup> | 1.7            |
|             | Minimum ratio $\beta/\alpha$ to avoid medusoid regains  | 6       | 86 <sup>c</sup> | 6              |
|             |                                                         |         |                 |                |

<sup>a</sup>In the ML estimate, only changes involving 2 states with each more than 95% of likelihood are counted.

<sup>b</sup>Minimum ratio  $\alpha/\beta$ , so that at least 1 branch with a 95% probability for “fixed gonophore” occurs in the ancestry of extant species with medusa.

<sup>c</sup>Minimum ratio  $\beta/\alpha$ , so that all ancestor of extant species with medusoids of the Macrocolonia have less than 95% probability for the fixed gonophore state. All reconstructions were done on the ultrametric ML tree using Mesquite.

Unexpectedly, our analyses obtained monophyly for species of thecates having medusae with statocysts (See Supplementary Fig. 2b) (clade Statocysta). Consequently, the absence of statocysts in some leptomedusae (e.g., *Stauroidiscus gotoi*, *Moderia secunda*, *Melicertum octocostatum*) is ancestral and not derived as traditionally thought (Bouillon 1984, 1985). It is interesting to note that, leaving apart those species that have completely lost their pelagic stage, there is no instance of statocyst loss among Statocysta because even species with highly simplified medusae (medusoids) have retained them. This contrasts with the medusoids of Macrocolonia, which lack statocysts.

#### Evolution of Colony Morphology and its Connection to Life Cycle Evolution

Adult colonies of Thecata have distinct shapes that can be classified into 3 major types: stolonial colonies (polyps are directly connected to the creeping common part of the colony), erect colonies with an unbranched stem (polyps on pedicels are borne on a vertical unbranched common axis) and erect and branched colonies (see drawings on Fig. 4, a branched stem bears the hydranths on pedicels). Here, colonies are inferred as ancestrally stolonial, and the erect unbranched and erect branched morphologies are derived. This is coherent with the reported ontogenetic sequence in which a

FIGURE 4. (continued.) When this value was lower than 90%, the ML reconstruction is shown in a pie chart. Pie charts indicate the relative degree of support for alternative character states. Illustrations of the characters are adapted from Bouillon et al. (2005). For terminal taxa with medusoids in their life cycle, numbers associated with the grey square indicate the type of medusoid (Millard 1975; Bouillon et al. 2006), from the most simple to most complex type: 1 = cryptomedusoid (possessing only the subumbrellar cavity, striated muscle used for swimming, and velum, but lacking gastro-vascular apparatus and tentacles); 2 = eumedusoid without tentacles (having a reduced gastrovascular system in addition to the structures present in cryptomedusoids); and 3 = eumedusoid with small tentacles (in addition to structures present in type 2). Note that the gonophores of *Gonothyrea loveni* have been described as cryptomedusoids (Bouillon et al. 2006), but as they are not liberated, they are simply coded here as fixed gonophores. More generally, there is also a described gradation in the complexity of fixed gonophore anatomies, but as data are available for only a limited number of species, we did not take this into account.

stolonial stage precedes the erect stage in all species with a stem (Bryant 1991).

Colony shape is highly stable within Macrocolonia, a clade characterized by a synapomorphic transition from the stolonial to the erect and branched morphology (Fig. 4), with reversion(s) to an unbranched stem occurring only in the genus *Antennella* and perhaps in species of *Halecium* (not sampled). There are very rare instances of reversion to the stolonial condition in Sertulariidae, but these species are not represented in our analysis. The situation is radically different within Statocysta, with at least 10 inferred transitions from the stolonial to the erect form. In addition, the stolonial morphology of some species of *Clytia* (notably *C. hemisphaerica*) seems to result from a reversion from the erect branched state. However, this conclusion is not statistically supported by ML optimization (<95%, Fig. 4). As for life cycle types, most changes affecting colony shape are located in the terminal branches of the tree (15/20, Fig. 4), and notably, the acquisitions of the intermediate state (erect unbranched) were significantly concentrated in terminal branches (8/10).

Some degree of correlation between life cycle and colony shape evolution can be suspected by comparing the patterns of evolutionary changes for these 2 characters (Fig. 4). We checked for this correlation using the Pagel's (1994) ML test and BayesTraits bayesian test for correlated (discrete) character evolution. The correlation was clearly supported by both methods (Pagel's ML test:  $P < 0.001$  from 1000 simulations; BayesTraits test:  $P < 0.001$  from 5,000,000 generations with 50,000 discarded as burn in). Medusae tend to be associated with stolonial colonies and fixed gonophores with erect colonies.

#### Evolution of Other Important Polyp Characters

A classical synapomorphy of Thecata is the acquisition of the theca, a usually rigid, skeletal chitinous envelope surrounding the polyps. In our taxonomic sampling, thecae are missing in all non-Thecata hydrozoans as well as in 2 species of Thecata, *M. octocostatum* and *Eugymanthea inquilina*. In the latter species, absence of thecae is unambiguously the result of a loss (Supplementary Fig. 2c), easily explainable by its endobiotic life style within mussels. The case of *M. octocostatum* is more problematic because of its basal position among Thecata. The absence of thecae in *M. octocostatum* and its presence in *L. dumosa* (sister group of all other Thecata in our combined analyses) result in an uncertainty for this character state at the base of Thecata (Supplementary Fig. 2c). In addition, the branching order between *Lafoea*, *Melicertum* and the other thecates remains uncertain (low support values in this study: Figs. 1–3; incongruent topologies between MP and ML analyses in Cartwright et al. 2008). However, in 18S rRNA analyses (Fig. 1), *M. octocostatum* is the sister group of *Stegella lobata* (excluded from the combined analysis because of missing data for 16S and 28S rRNAs), a species with thecae. This observation, together with the presence of small thecae

in another species of *Melicertum* (*Melicertum campanula*, Gemmill 1921) favors the assumption that thecae were present in the last common ancestor of Thecata.

According to our character optimization (Supplementary Fig. 2d), defensive polyps (dactylozooids) were acquired only once within Macrocolonia in the ancestor of Plumularioidea (which includes *Hydrodendron*) in conflict with a previous phylogenetic study suggesting their convergence between Plumularioidea and *Hydrodendron* (Leclère et al. 2007). In our tree (Fig. 3), however, there were probably 2 additional acquisitions of defensive polyps outside Macrocolonia, in some species of *Lovenella* and in some members of Lafoeidae (Bouillon et al. 2006), but these events cannot be inferred from our trees because dactylozooid-bearing species of these taxa were not included in our analyses.

#### DISCUSSION

Our combined analyses of 16S, 18S, and 28S rRNAs provide a well-resolved phylogeny of Thecata, strongly supporting the hypothesis that a majority of Thecata species belong to 2 highly diversified monophyletic groups, Macrocolonia (large erect and branched colonies) and Statocysta (medusae with statocysts). These conclusions are in agreement with the topology retrieved in a recently published phylogeny of hydrozoans (Cartwright et al. 2008), based on the same molecular markers but with a much more reduced sampling of Thecata (25 species) than ours.

#### Patterns of Life Cycle Character Transformations in Thecate Hydrozoans

The traditional view that the ancestral life cycle of Thecata comprised an alternation between polyp and medusa stages, with medusa less life cycles (as in most species of Macrocolonia) representing a derived situation, is clearly confirmed by our character optimization onto the molecular tree, although with low ML support (Fig. 4). Absence of medusae in the ancestor of Thecata would imply convergence between thecate and non-thecate hydromedusae, a highly unlikely scenario as they share many common anatomical features absent in scyphomedusae and cubomedusae (velum, 2 nerve rings, 4 radial canals, tentacle bulbs, etc.). Complete loss of the pelagic stage is inferred to have occurred at least 13 times within Thecata, the convergent nature of these losses being strongly supported by AU tests rejecting the monophyly of medusa less taxa (Table 2).

Simple medusae devoid of a mouth opening (medusoids) have been acquired through 2 different evolutionary pathways, according to our analyses (Fig. 4), that is, either by medusa simplification or by *de novo* re-acquisition of a pelagic stage from medusa-less ancestors. Thus, outside Macrocolonia, medusoids clearly represent secondarily simplified medusae (e.g., in species of *Orthopyxis* or in *H. margarica*, see Cornelius 1992). These simplifications are believed to have occurred through paedomorphosis (more specifically, progenesis,



Gould 1977), that is, truncation of medusa development (Boero and Bouillon 1987; Boero et al. 1997). By contrast, the medusoids occurring in some species of Macrocolonia (*A. operculata*, *G. hians*, and *P. obliqua*) are probably not secondary simplified medusae but simple pelagic forms re-acquired independently and repeatedly from polyp-only ancestors, as already demonstrated in a recent phylogenetic study of Plumularioidea (Leclère et al. 2007). These medusoids can thus be considered swimming gonophores.

In fact, these analyses probably underestimate the number of medusoid acquisitions among Macrocolonia because there are additional species with medusoids that were not included in the combined molecular phylogeny. Notably, the 2 plumularioid species, *Macrorhynchia philippina* and *Dentitheca bidentata* for which we have only 16S rRNA data, produce medusoids (Gravier 1970; Migotto and Marques 1999; Bourmaud and Gravier-Bonnet 2004) but do not group with other species with medusoids of Macrocolonia in the 16S rRNA analyses (Supplementary Fig. 1). Furthermore, there are several described species of Macrocolonia with medusoids that were not sequenced here (*Sertularia loculosa*, *Sertularia turbinata*, *Sertularia marginata*, Migotto 1998; *Sertularella diaphana* and *Sertularella* sp., Gravier-Bonnet and Lebon 2002; *Gymangium ferlusi* and *Hydrodendron* sp., Gravier-Bonnet personal communication; and *Nemalecium lighti*, Gravier-Bonnet and Migotto 2000), these species being taxonomically distant from each other and from species with medusoids sampled in this study, at least according to their colony and polyp morphology.

Medusoid evolution from polyp-only ancestors in Macrocolonia offers an interesting example of “reverse evolution” (Teotónio and Rose 2001), with re-acquisition of a set of characters (most notably, the striated musculature of the medusa bell and the velum, a muscular membrane characteristic for hydrozoan medusae) that had been previously lost (Leclère et al. 2007). That such re-evolution of complex features is possible (against the famous “Dollo’s law,” Dollo 1893, see Gould 1970; Collin and Miglietta 2008) is gaining more and more credibility from recent phylogenetic studies, as illustrated by the proposed re-acquisition of pelagic larvae in echinoderms (Hart et al. 1997, but see Cunningham 1999), of a coiled shell in *Crepidula* (Collin and Cipriani 2003), of posterior limbs in some cetaceans (Bejder and Hall 2002), or of the wings in stick insects (Whiting et al. 2003; but see Trueman et al. 2004).

However, in the case of life cycle in Macrocolonia, this reverse evolution is incomplete because there is no documented case of reversal to a fully developed medusa capable of feeding and growing autonomously. Notably, a previous suggestion that the morphologically aberrant medusa of *Obelia* evolved through a reversal from a medusa less ancestor (Boero and Sarà 1987) is contradicted by our character optimization (Fig. 4), supporting instead the homology between the medusae of *Obelia* and of other Hydrozoa, in agreement with a published molecular phylogeny of the Campanulariidae (Govindarajan et al. 2006).

A major weakness of all proposals of “complex” character re-acquisition cited above (including ours) is the incapacity to evaluate the relative probabilities of loss and gain for these structures, independently from the phylogeny. Insights into the genetic factors conditioning complex structure loss and re-acquisition are expected to come from comparative studies of developmental genes. For example, the investigation in various thecate species with medusae and with medusoids of genes such as *Mef2* and *Snail*, previously identified as striated muscle markers in the *Podocoryna* medusa (Spring et al. 2002), could help test the hypothesis that re-acquisition of a pelagic stage involved the re-activation of a genetic program still persisting in species with fixed gonophores but functioning in other developmental contexts (Leclère et al. 2007).

#### *Life Cycle Evolution does not Follow the “Phyletic Gradualism” Model*

Our projection of character evolution onto the molecular phylogeny (Fig. 4) clearly indicates that life cycle evolution in Thecata does not conform to a “phyletic gradualism” model. Under phyletic gradualism, we would expect to observe clades containing successively branching species in ancestral, intermediate, and advanced evolutionary stages (Blackburn 1995). This is not the emerging pattern (Fig. 4) because most medusa suppressions (8/11) fail to be preceded by a medusoid evolutionary stage. The same conclusion emerges from the phylogenetic distribution of medusoid morphotypes, which differ from each other in terms of anatomical complexity (Fig. 4, see Materials and Methods section for details). These medusoid types (labeled 1, 2, and 3 from more simple to more complex on Fig. 4) are clearly dispersed in the tree rather than being arranged in evolutionary sequences. They correspond to independent simplifications of the medusa (in non-Macrocolonia) and independent re-acquisitions from a polyp-only ancestor (in Macrocolonia), not to transitional forms on the way toward medusa suppression. That species sampling was not exhaustive cannot explain this pattern because species with medusoid are largely over-represented in this study and because all genera with medusoids described among non-Macrocolonia have been included in the data set with the exception of the 2 monospecific genera *Tripoma* and *Clathrozoön* (Bouillon et al. 2006). Phyletic gradualism for life cycle evolution is, however, supported in a single case, in the “*Campanularia/Bonneviella/Orthopyxis*” clade, among Statocysta (Fig. 4), with a succession of full medusa (in the out-group), medusoid (acquired in the common branch of the clade), and fixed gonophore (acquired 3 times independently). Branch lengths in this clade are very short (see Fig. 3), suggesting that these transitions occurred within a very short time frame relatively to the antiquity of Thecata.

An additional striking characteristic of life cycle evolution among Thecata is the concentration of character changes in terminal branches (Fig. 4). This is true of most

(8/10) suppressions of the medusa stage among Statocysta (Fig. 4). A particularly persuasive case of rapid suppression of the medusa stage concerns *Opercularella pumila* for which complete medusa loss happens in a very short terminal branch (cf. Figs. 3 and 4). Acquisitions of medusoids are also clearly concentrated in recent lineages among Statocysta (medusa reductions) as well as among Macrocolonia (transitions from fixed to swimming gonophore) (cf. Figs. 3 and 4). Because there is no reason to invoke an acceleration of the rate of character changes in recent times, this pattern reveals that life cycle type tends to be conserved in the long term within each of the main clades (Macrocolonia and Statocysta), through recurrent elimination of deviating lineages, and in particular that “intermediate” life cycles (with medusoids) are short-lived at a large evolutionary scale. The recent (not yet eliminated) losses inferred in our analyses would thus be the “tip of the iceberg” of all losses that have occurred in Thecata during their history.

#### *Two Alternative Evolutionarily Stable Strategies in Thecata*

The evolution of colony shape follows similar trends. All changes from (ancestral) stolonial to (derived) erect + branched colonies fail to be associated with the intermediate erect unbranched form (Fig. 4). The only potential instance of gradual evolution for colonial shape is observed among Statocysta in the *Obelia/Laomedea/Clytia* clade (Fig. 4), with parsimony reconstruction suggesting reverse gradual evolution from erect branched toward “stolonial,” but this scenario is not statistically supported in the ML analysis (Fig. 4). Furthermore, transitions to the intermediate phenotype (erect unbranched) are concentrated in terminal/recent branches (Fig. 4), and thereby lineages harboring this intermediate type of colonies are short-lived.

Using Pagel’s (1994) and BayesTraits Bayesian character correlation tests, we further demonstrated a correlation between character changes concerning the life cycle and colony structure. The correlation is not perfect but it is statistically significant. Consistent with our observed pattern, previous statistical analyses among extant species have demonstrated that stolonial colonies are often associated with the presence of a medusa, whereas complex colonies usually have fixed gonophores (Naumov 1960; Ryland and Warner 1986; Cornelius 1990).

These phylogenetic inferences thus support the existence among Thecata of 2 evolutionarily stable and mutually exclusive life history strategies, with intermediate situations possible but short-lived at the geological scale, and a low frequency of full transitions from one strategy to the other. The ancestral life history strategy (hereafter called “Strategy 1”) involves stolonial colonies that are generally annual (Cornelius 1990) and produce numerous medusae, permitting long-range dispersal. The alternative (derived) strategy (“Strategy 2”) is represented by large, erect, and branched colonies, usually perennial (Cornelius 1990) and having poor dispersal capacities (Cornelius 1990; Sommer 1992).

Not only do they fail to liberate medusa and thus do not disperse their gametes across wide distances but they also tend to brood their embryos and to produce planula larvae that move very little and settle near the parent colony, sometimes with a special mucus thread connecting the released planulae with the parent colony (Hughes 1977; Sommer 1992), thus maximizing philopatry and local maintenance of the population. Strategy 1 is an investment in reproductive/dispersive tissue (medusa) to the reduction of colony and Strategy 2 is the investment of somatic tissue to the reduction of reproductive/dispersive function.

These distinctive dispersal characteristics are likely correlated with distinctive colony capacities with respect to competition for the substrate. The tree-shaped perennial colonies of Macrocolonia (Strategy 2) are optimized for long-term settlement on the substrate. The stolonial colonies of most Statocysta (Strategy 1) feature the typical morphology of runners exploring spatial refuges (Buss 1979; Jackson 1979), some species being furthermore specialized on living substrates (e.g., algae or other animals) where they encounter few competitors. Thus, using the terminology introduced by Grime (1977), we suggest as a stimulating hypothesis to be tested in future ecological studies that erect and branched colonies are of the competitive type, whereas stolonial colonies are either of the ruderal type (for species behaving as pioneers on free substrates or as runners) or of the stress-tolerant type (for specialist species, i.e., species adapted to overcome the arsenal deployed by their living substrate against epibiont settlement). A common feature of pioneers, runners, and specialist epibionts is that they reside in spatial refuges. They must constantly colonize new refuges to maintain viable populations, and this probably represents a selection pressure for the maintenance of high dispersal capacity.

#### *A Punctuational Analogue at the Clade Level?*

The phylogenetic pattern described here for life history traits of thecate hydrozoans closely matches the operational criteria presented by Blackburn (1995, 1998) as predictions derived from the “punctuated equilibrium model”: character states are not arranged into evolutionary series between extreme states, intermediate states are evolutionarily short-lived, and character states present a bimodal distribution among living species (see Supplementary Fig. 3). The original theory of punctuated equilibrium (Eldredge and Gould 1972) describes the appearance of species in geological time in terms of rapid episodes of speciation associated with phenotypic changes, alternating with long periods of morphological stasis. Gould (2002) argued in favor of a generalization of the theory at larger scales and used the terms “punctuation above the species level” or “punctuational analogs in lineages” for macroevolutionary patterns “conceptually homologous” to punctuated equilibria, even though the proximal causes responsible for these patterns at the

species level and above the species level are clearly not the same. According to him, clade “nontrending” (i.e., conservativeness) is similar to stasis in the history of species. Likewise, concentration of phenotypic change in “very short episodes relative to periods of stability in basic design during the normal waxing and waning of clades” is similar to punctuation in the punctuated equilibrium model.

Empirical cases presented as instances of such punctuational patterns in the literature include transitions from oviparity to viviparity in squamates (Blackburn 1995, 1998), the evolution of larval types in metazoans (Wray 1995), and mitochondrial gene losses in angiosperms (Adams et al. 2002).

According to this conceptual framework, the 2 evolutionary stable strategies defined above for Thecata can be viewed as stasis analogs and the concentration of changes affecting life cycle and colony shape in recent branches as “punctuational” (as for multiple recent acquisitions of viviparity in squamates, Blackburn 1995, 1998). A particularly central claim in Gould’s (2002) considerations about punctuated evolution above the species level is that character stability across evolutionary time, such as long-term maintenance of the medusa in Statocysta despite frequent recent losses, must be regarded as an active phenomenon calling for causal explanations.

*The Causal Explanation of Macroevolutionary Patterns: Evidence for Species Selection in Thecata*

As pointed out by Cornelius (1990, 1992), the high frequency of medusa loss and the absence of full reversals should have led long ago to the total disappearance of the medusa, which is clearly not the case for non-Macrocolonia thecates. The observed concentration of medusa losses in a relatively recent period suggests higher extinction rates for species having lost the medusa phase (see above). Therefore, the Cornelius paradox can be easily resolved by invoking species selection. This macroevolutionary process occurs when the extinction or diversification of a species is affected by fitness differences of heritable species-level traits (Grantham 1995; Duda and Palumbi 1999; Gould 2002). Medusa loss might be advantageous under some circumstances at the individual level (e.g., because more metabolic resources becomes available for colony growth) but it implies a drastic reduction in long-range dispersive capacity, with the probable consequence of limiting the geographic distribution of the species (an emergent species-level trait, Grantham 1995) as well as increasing its susceptibility to local environmental changes (Duda and Palumbi 1999) (a trait reducible to the organismic level, Grantham 1995). These lineages might rarely persist long enough for a shift to the other stable strategy to occur, that is, for the shape and biology of the colony to become adjusted to a life cycle without medusa.

Macrocolonia has successfully lost the medusa and shifted to Strategy 2. This group has undergone strong

diversification (around 1350 known species belong to Macrocolonia, Bouillon et al. 2006), possibly because of a higher speciation rate than in species with medusa (Statocysta includes probably only about 380 described species, Bouillon et al. 2006). As pointed out by Duda and Palumbi (1999) in their phylogenetic study of dispersion modes (with or without planktonic phase) in the gastropod genus *Conus*, strong clade diversification following reduction of dispersal capacity is good evidence for species selection. Limited dispersal in Macrocolonia probably implies low levels of gene flow, and thereby frequent local speciation, as opposed to larger, panmictic populations in thecate species with medusa (as in most Statocysta). In this explanation, an emergent species-level trait (geographical range) affect an emergent component of species-level fitness (speciation rate) (a case of “class A” species sorting according to the classification of Grantham 1995). The hypotheses of species selection proposed here are closely akin to Jablonski’s (1987) interpretation of macroevolutionary patterns in fossil gastropods, where planktotroph species have significantly larger geographic ranges, longer temporal duration, and lower speciation rates than nonplanktotroph species.

Finally, gains of medusoids inferred among Macrocolonia are relatively recent and concern only a few isolated species, suggesting that species of Macrocolonia with medusoid are eliminated in the long term. In addition, acquisition of a medusoid stage in a Macrocolonia species is not likely to increase dispersal significantly, as medusoids are very short-lived (a few hours) and liberate gametes just after their release (Bourmaud and Gravier-Bonnet 2004). Thus, rather than lower speciation rate, higher extinction rate probably explains the low prevalence of species with medusoids among Macrocolonia. Although transition to a life cycle with medusoids may be advantageous in the short term (e.g., because more eggs are produced, Tessier 1922), the concomitant loss of embryo brooding on the colony (a trait reducible to the organismic level, Grantham 1995) perhaps increases extinction rate in these species.

Prospects for future studies include field experiments designed to test our predictions about the ecological aspects of both evolutionary stable strategies identified among Thecata, as well as phylogenetic studies on other hydrozoan groups comprising a diversity of life cycle and colony architecture types (e.g., Capitata, Filifera, Aplanulata), to assess whether or not the macroevolutionary trends described here for the evolution of life history traits among thecates are generalizable to the whole class Hydrozoa.

SUPPLEMENTARY MATERIAL

Supplementary material can be found at: <http://www.sysbio.oxfordjournals.org/>.

ACKNOWLEDGMENTS

We thank Eric Quéinnec for his useful comments and remarks and Pierrette Lamarre, Muriel Jager, and Annie



Tillier for their technical assistance. Nine sequences used in this work have been issued from the Cnid-ToL program and kindly provided by P. Cartwright and we are grateful to her for that. Thanks also to E. Bapteste and P. Lopez for their help and insights about bioinformatics. This work was supported by the "Consortium National de Recherche en Génomique" and by the "service de systématique moléculaire" of the Muséum National d'Histoire Naturelle (IFR 101). It is part of the agreement n° 2005/67 between the Genome and the Muséum National d'Histoire Naturelle on the project "Macrophylogeny of life" directed by Guillaume Lecointre.

#### REFERENCES

- Adams K.L., Qiu Y.L., Stoutemyer M., Palmer J.D. 2002. Punctuated evolution of mitochondrial gene content: high and variable rates of mitochondrial gene loss and transfer to the nucleus during angiosperm evolution. *Proc. Natl. Acad. Sci. USA.* 99:9905–9912.
- Bejder L., Hall B.K. 2002. Limbs in whales and limblessness in other vertebrates: mechanisms of evolutionary and developmental transformation and loss. *Evol. Dev.* 4:445–458.
- Blackburn D.G. 1995. Saltationist and punctuated equilibrium models for the evolution of viviparity and placentation. *J. Theor. Biol.* 174:199–216.
- Blackburn D.G. 1998. Reconstructing the evolution of viviparity and placentation. *J. Theor. Biol.* 192:183–190.
- Boero F., Bouillon J. 1987. Inconsistent evolution and pedomorphosis among the hydroids and medusae of the Athecatae/Anthomedusae and the Thecatae/Leptomedusae (Cnidaria, Hydrozoa). In: Bouillon J., Boero F., Cicogna F., Cornelius P.F.S., editors. *Modern trends in the systematics, ecology and evolution of Hydroid and Hydromedusae.* Oxford: Clarendon Press. p. 229–250.
- Boero F., Bouillon J. 1989. An evolutionary interpretation of anomalous medusoid stages in the life cycles of some Leptomedusae (Cnidaria). In: Ryland J.S., Tyler P.A., editors. *Reproduction, genetics and distribution of marine animals. Proceeding of the 23rd European Marine Biology Symposium.* Olsen and Olsen, Fredensborg. p. 37–41.
- Boero F., Bouillon J., Piraino S., Schmid V. 1997. Diversity of hydroidomedusan life cycles: ecological implications and evolutionary patterns. In: den Hartog J.C., van Ofwegen L.P., van der Spoel S., editors. *Proceedings of the 6th International Conference on Coelenterate Biology, 1995.* Nationaal Natuurhistorisch Museum, Leiden. p. 53–62.
- Boero F., Sarà M. 1987. Motile sexual stages and evolution of Leptomedusae (Cnidaria). *Boll. Zool.* 54:131–139.
- Bouillon J. 1984. Révision de la famille des Phialuciidae (Kramp, 1955) (Leptomedusae, Hydrozoa, Cnidaria), avec un essai de classification des Thecatae-Leptomedusae. *Indo-Malayan Zool.* 1:1–24.
- Bouillon J. 1985. Essai de classification des hydropolypes-hydroméduses (Hydrozoa-Cnidaria). *Indo-Malayan Zool.* 2:29–243.
- Bouillon J., Gravili C., Pagès F., Gili J.M., Boero F. 2006. An introduction to Hydrozoa. *Mém. Mus. Natl. Hist. Nat.* 194:1–591.
- Bouillon J., Medel M.D., Pagès F., Gili J.M., Boero F., Gravili C. 2005. Fauna of the Mediterranean Hydrozoa. *Sci. Mar.* 68:5–438.
- Bournaud C., Gravier-Bonnet N. 2004. Medusoid release and spawning in the life cycle of *Macrorhynchia philippina* Kirchenpauer 1872 (Cnidaria, Hydrozoa, Aglaopheniidae). *Hydrobiologia.* 530–531:199–208.
- Brusca R.C., Brusca G.J. 2003. *Invertebrates.* 2nd ed. Sunderland (MA): Sinauer. 936 p.
- Bryant H.N. 1991. The polarization of character transformations in phylogenetic systematics: role of axiomatic and auxiliary assumptions. *Syst. Zool.* 40:433–445.
- Buss L.W. 1979. Habitat selection, directional growth and spatial refuges: why colonial animals have more hiding places. In: Larwood G.P., Rosen B.R., editors. *Biology and systematics of colonial organisms.* New York: Academic Press (Systematics association special volume; vol. 11). pp. 459–497.
- Cannone J.J., Subramanian S., Schnare M.N., Collett J.R., D'Souza L.M., Du Y., Feng B., Lin N., Madabusi L.V., Muller K.M., Pande N., Shang Z., Yu N., Gutell R.R. 2002. The comparative RNA web (CRW) site: an online database of comparative sequence and structure information for ribosomal, intron, and other RNAs. *BMC Bioinformatics* 3:2 p.
- Cartwright P., Evans N.M., Dunn C.W., Marques A.C., Miglietta M.P., Schuchert P., Collins A.G. 2008. Phylogenetics of Hydroidolina (Hydrozoa: Cnidaria). *J. Mar. Biol. Assoc. U.K.* 88:1663–1672.
- Coffroth M.A., Lasker H.R., Diamond M.E., Bruenn J.A., Bermingham E. 1992. DNA fingerprints of a gorgonian coral: a method for detecting clonal structure in a vegetative species. *Mar. Biol.* 114:317–325.
- Collin R., Cipriani R. 2003. Dollo's law and the re-evolution of shell coiling. *Proc. Biol. Sci.* 270:2551–2555.
- Collin R., Miglietta M.P. 2008. Reversing opinions on Dollo's law. *Trends Ecol. Evol.* 23:602–609.
- Collins A.G., Schuchert P., Marques A.C., Jankowski T., Medina M., Schierwater B. 2006. Medusozoan phylogeny and character evolution clarified by new large and small subunit rDNA data and an assessment of the utility of phylogenetic mixture models. *Syst. Biol.* 55:97–115.
- Cornelius P.F.S. 1990. Evolution in leptolid life-cycles (Cnidaria: Hydrozoa). *J. Nat. Hist.* 24:579–594.
- Cornelius P.F.S. 1992. Medusa loss in leptolid Hydrozoa (Cnidaria), hydroid rafting, and abbreviated life-cycles among their remote-island faunas: an interim review. *Sci. Mar.* 56:245–261.
- Cunningham C.W. 1999. Some limitations of ancestral character-state reconstruction when testing evolutionary hypotheses. *Syst. Biol.* 48:665–674.
- Cunningham C.W., Buss L.W. 1993. Molecular evidence for multiple episodes of pedomorphosis in the family Hydractiniidae. *Biochem. Syst. Ecol.* 21:57–69.
- Dollo L. 1893. Les lois de l'évolution. *Bull. Soc. Belge Geol. Paleontol. Hydrol.* 7:164–166.
- Duda T.F. Jr., Palumbi S.R. 1999. Developmental shifts and species selection in gastropods. *Proc. Natl. Acad. Sci. USA.* 96:10272–10277.
- Edgar R.C. 2004. MUSCLE: multiple sequence alignment with high accuracy and high throughput. *Nucleic Acids Res.* 32:1792–1797.
- Eldredge N., Gould S.J. 1972. Punctuated equilibria: an alternative to phyletic gradualism. In: Schopf T.J.M., editor. *Models in Paleobiology.* San Francisco (CA): Freeman, Cooper & Co. p. 82–115.
- Felsenstein J. 1985. Confidence limits on phylogenies: an approach using the bootstrap. *Evolution.* 39:783–791.
- Gemmill J.F. 1921. The life-history of *Melicertidium octocostatum* (Sars), a Leptomedusan with a theca-less Hydroid Stage. *Q. J. Microsc. Sci.* 259:339–347.
- Gould S.J. 1970. Dollo's Law: irreversibility and the status of evolutionary laws. *J. Hist. Biol.* 3:189–212.
- Gould S.J. 1977. *Ontogeny and phylogeny.* Cambridge (MA): Harvard University Press. 501 p.
- Gould S.J. 2002. *The structure of evolutionary theory.* Cambridge (MA): Harvard University Press. 1433 p.
- Govindarajan A.F., Boero F., Halanych K.M. 2006. Phylogenetic analysis with multiple markers indicates repeated loss of the adult medusa stage in Campanulariidae (Hydrozoa, Cnidaria). *Mol. Phylogenet. Evol.* 38:820–834.
- Grantham T.A. 1995. Hierarchical approaches to macroevolution: recent work on species selection and the "effect hypothesis". *Annu. Rev. Ecol. Syst.* 26:301–321.
- Gravier N. 1970. Libération des médusoides par *Macrorhynchia philippina* Kirchenpauer, 1872 (Hydrozoa, Plumulariidae). *Recl. Trav. Stn. Mar. Endoume.* 10(Fasc hors serie Suppl.):253–257.
- Gravier-Bonnet N., Lebon M.L. 2002. Swimming medusoid gonophores in two species of Sertulariella (Cnidaria, Hydrozoa, Sertulariidae) from Réunion Island, Indian Ocean. *Invertebr. Reprod. Dev.* 41:101–108.
- Gravier-Bonnet N., Migotto A.E. 2000. Gonangium development and medusoid of *Nemalecium lighti* (Hargitt, 1924) (Cnidaria: Hydrozoa, Haleciidae). *Sci. Mar.* 64:207–213.

- Grime J.P. 1977. Evidence for the existence of three primary strategies in plants and its relevance to ecological and evolutionary theory. *Am. Nat.* 111:1169–1194.
- Guidon S., Gascuel O. 2003. A simple, fast, and accurate algorithm to estimate large phylogenies by maximum likelihood. *Syst. Biol.* 52:696–704.
- Hall T.A. 1999. BioEdit: a user-friendly biological sequence alignment editor and analysis program for Windows 95/98/NT. *Nucleic Acids. Symp. Ser.* 41:95–98.
- Hart M.W., Byrne M., Smith M.J. 1997. Molecular phylogenetic analysis of life-history evolution in asterinid starfish. *Evolution*. 51:1848–1861.
- Hughes R.G. 1977. Aspects of the biology and life-history of *Nemertea antennina* (L.). (Hydrozoa: Plumulariidae). *J. Mar. Biolog. Assoc. U.K.* 57:641–657.
- Jablonski D. 1987. Heritability at the species level: analysis of geographic ranges of Cretaceous mollusks. *Science*. 238:360–363.
- Jackson J.B.C. 1979. Morphological strategies of sessile animals. In: Larwood G.P., Rosen B.R., editors. *Biology and systematics of colonial organisms*. New York: Academic Press (Systematics association special volume; vol. 11). p. 499–555.
- Leclère L., Schuchert P., Manuel M. 2007. Phylogeny of the Plumularioidea (Hydrozoa, Leptothecata): evolution of colonial organization and life cycle. *Zool. Scr.* 36:371–394.
- Maddison W.P., Maddison D.R. 2009. Mesquite: a modular system for evolutionary analysis. Version 2.6. Available from: URL <http://mesquiteproject.org/Mesquit.Folder/docs/mesquite/publication.html>.
- Marques A.C., Collins A.G. 2004. Cladistic analysis of Medusozoa and cnidarian evolution. *Invertebr. Biol.* 123:23–42.
- Medina M., Collins A.G., Silberman J.D., Sogin M.L. 2001. Evaluating hypotheses of basal animal phylogeny using complete sequences of large and small subunit rRNA. *Proc. Natl. Acad. Sci. USA*. 98:9707–9712.
- Migotto A.E., 1998. The life cycle of *Sertularia marginata* Kirchenpauer, 1864 (Cnidaria, Hydrozoa): a medusoid-producing sertulariid. *J. Nat. Hist.* 32:1–12.
- Migotto A.E., Marques A.C. 1999. Redescription of *Dentitheca bidentata* (Cnidaria: Hydrozoa, Plumulariidae), with notes on its life cycle. *J. Nat. Hist.* 33:949–960.
- Millard N.A.H. 1975. Monograph on the Hydroida of southern Africa. *Ann. S. Afr. Mus.* 68:1–513.
- Morton J.E. 1957. Mosaic evolution in hydroids. *Nature*. 180:130–131.
- Motz-Kossowska S. 1907. Sur le gonophore de *Plumularia obliqua* Saunders et *Sertularia operculata* L. *Arch. Zool. Exp. Gén.* 4:114–118.
- Moura C.J., Harris D.J., Cunha M.R., Rogers A.D. 2008. DNA barcoding reveals cryptic diversity in marine hydroids (Cnidaria, Hydrozoa) from coastal and deep-sea environments. *Zool. Scr.* 37:93–108.
- Naumov D.V. 1960. Hydroids and hydromedusae of the USSR. [Translated from the Russian in 1969. J. Salkind, translator]. Jerusalem (Israel): Israel Program for Scientific Translations. 660 p.
- Nylander J.A.A. 2004. MrModeltest v2. Program distributed by the author. Department of Systematic Zoology, Uppsala University.
- Pagel M. 1994. Detecting correlated evolution on phylogenies: a general method for the comparative analysis of discrete characters. *Proc. Roy. Soc. Lond. B.* 255:37–45.
- Pagel M., Meade A. 2006. Bayesian analysis of correlated evolution of discrete characters by reversible-jump Markov chain Monte Carlo. *Am. Nat.* 167: 808–825.
- Petersen K.W. 1990. Evolution and taxonomy in capitate hydroids and medusae (Cnidaria: Hydrozoa). *Zool. J. Linn. Soc.* 100:101–231.
- Pont-Kingdon G., Vassort C.G., Warrior R., Okimoto R., Beagley C.T., Wolstenholme D.R. 2000. Mitochondrial DNA of *Hydra attenuata* (Cnidaria): a sequence that includes an end of one linear molecule and the genes for l-rRNA, tRNA(f-Met), tRNA(Trp), COII, and AT-Pase8. *J. Mol. Evol.* 51:404–415.
- Ronquist F., Huelsenbeck J.P. 2003. MrBayes 3: Bayesian phylogenetic inference under mixed models. *Bioinformatics*. 19:1572–1574.
- Ryland J.S., Warner G.F. 1986. Growth and form in modular animals: ideas on the size and arrangement of zooids. *Philos. Trans. R. Soc. Lond., B, Biol. Sci.* 313:53–76.
- Shimodaira H. 2002. An approximately unbiased test of phylogenetic tree selection. *Syst. Biol.* 51:492–508.
- Shimodaira H., Hasegawa M. 2001. CONSEL: for assessing the confidence of phylogenetic tree selection. *Bioinformatics*. 17:1246–1247.
- Sommer C. 1992. Larval biology and dispersal of *Eudendrium racemosum* (Hydrozoa, Eudendriidae). In: Bouillon J., Boero F., Cicogna F., Gili J.M., Hughes R.G., editors. *Aspects of hydrozoan biology*. *Sci. Mar.* 56:205–211.
- Spring J., Yanze N., Jösch C., Middel A.M., Winninger B., Schmid V. 2002. Conservation of Brachyury, Mef2, and Snail in the myogenic lineage of jellyfish: a connection to the mesoderm of bilateria. *Dev. Biol.* 244:372–384.
- Swofford D.L. 1998. PAUP\*: phylogenetic analysis using parsimony (\*and other methods). Version 4. Sunderland (MA): Sinauer.
- Teotónio H., Rose M.R. 2001. Reverse evolution. *Evolution*. 55:653–660.
- Tessier G. 1922. Observation des medusoids libres et des planulas de *Sertularia operculata* L. *Bull. Soc. Zool. Fr.* 47:357–361.
- Trueman J.W.H., Pfeil B.E., Kelchner S.A., Yeates D.K. 2004. Did stick insects really regain their wings? *Syst. Entomol.* 29:138–139.
- Voigt O., Collins A.G., Pearse V.B., Pearse J.S., Ender A., Hadrys H., Schierwater B. 2004. Placozoa no longer a phylum of one. *Curr. Biol.* 14:R944–R945.
- Whiting M.F., Bradler S., Maxwell T. 2003. Loss and recovery of wings in stick insects. *Nature*. 421:264–267.
- Wray G.A. 1995. Punctuated evolution of embryos. *Science*. 267:1115–1116.
- Zuker M. 2003. Mfold web server for nucleic acid folding and hybridization prediction. *Nucleic Acids Res.* 31:3406–3415.

Received 23 August 2008; reviews returned 13 November 2008;  
accepted 30 June 2009

Associate Editor: Frank E. Anderson

APPENDIX 1. List of taxa examined in this study, GenBank accession numbers (16S, 18S, 28S rRNA), voucher numbers and origin data

| Order/family   | Species                         | 16S      | 18S      | 28S       | Voucher MHNG | Geographic origin/reference |
|----------------|---------------------------------|----------|----------|-----------|--------------|-----------------------------|
| Aplanulata     | <i>Candelabrum cocksii</i>      | AY512520 | AY920758 | AY920796  |              | Collins et al. (2006)       |
| Aplanulata     | <i>Hydra circumcincta</i>       | AY512521 | AF358080 | AY026371  |              | Collins et al. (2006)       |
| Capitata       | <i>Moerisia</i> sp.             | AY512534 | AF358083 | AY920801  |              | Collins et al. (2006)       |
| Capitata       | <i>Scrippsia pacifica</i>       | AY512551 | AF358091 | AY920804  |              | Collins et al. (2006)       |
| Capitata       | <i>Staurocladia wellingtoni</i> |          | FJ550523 | FJ550376  | INVE25379    | Wellington, New Zealand     |
| Filifera       | <i>Bougainvillia muscus</i>     |          | FJ550582 | FJ550439  |              | Roscoff, France             |
| Filifera       | <i>Eudendrium glomeratum</i>    |          | FJ550583 | FJ550440  | INVE49717    | Marseille, France           |
| Filifera       | <i>Podocoryna exigua</i>        | AY512513 | AF358092 | AY920802  |              | Collins et al. (2006)       |
| Laingiomedusae | <i>Fabienna sphaerica</i>       | AM183133 | AY920767 | AY920797  |              | Collins et al. (2006)       |
| Limnomedusae   | <i>Aglauropsis aeora</i>        |          | AY920754 | AY920793  |              | Collins et al. (2006)       |
| Limnomedusae   | <i>Limnocooida tanganyicae</i>  |          | AY920755 | AY920795  |              | Collins et al. (2006)       |
| Narcomedusae   | <i>Aegina citrea</i>            |          | AF358058 | AY920789  |              | Collins et al. (2006)       |
| Narcomedusae   | <i>Solmissus marshalli</i>      |          | AF358060 | AY920790  |              | Collins et al. (2006)       |
| Siphonophorae  | <i>Nectopyramis</i> sp.         | AY512512 | AF358068 | AY026377. |              | Collins et al. (2006)       |
| Siphonophorae  | <i>Physalia physalis</i>        | AY935284 | AF358066 |           |              | Collins et al. (2006)       |

Continued.

| Order/family    | Species                                      | 16S      | 18S      | 28S      | Voucher MHNG | Geographic origin/reference   |
|-----------------|----------------------------------------------|----------|----------|----------|--------------|-------------------------------|
| Trachymedusae   | <i>Pantachogon haeckeli</i>                  |          | AF358062 | AY920792 |              | Collins et al. (2006)         |
| Aequoreidae     | <i>Aequorea aequorea</i>                     | AY512518 | AF358076 |          |              | Collins et al. (2006)         |
| Aequoreidae     | <i>Aequorea victoria</i>                     | EU305469 | AF358077 | AY920799 |              | Collins et al. (2006)         |
| Aglaopheniidae  | <i>Aglaophenia acacia</i> <sup>a</sup>       | FJ550507 |          |          | INVE37535    | Ria de Ferrol, Galicia, Spain |
| Aglaopheniidae  | <i>Aglaophenia elongata</i>                  | FJ550508 | FJ550593 | FJ550450 | INVE37539    | Isola del Giglio, Italy       |
| Aglaopheniidae  | <i>Aglaophenia harpago</i>                   | FJ550506 | FJ550592 | FJ550449 | INVE37531    | Giglio Island, Italy          |
| Aglaopheniidae  | <i>Aglaophenia latecarinata</i> <sup>a</sup> | DQ855936 |          |          |              | Leclère et al. (2007)         |
| Aglaopheniidae  | <i>Aglaophenia octodonta</i>                 | DQ855915 | FJ550541 | FJ550397 | INVE32875    | Villefranche sur mer, France  |
| Aglaopheniidae  | <i>Aglaophenia parvula</i> <sup>a</sup>      | DQ855914 |          |          | INVE34013    | Leclère et al. (2007)         |
| Aglaopheniidae  | <i>Aglaophenia picardi</i> <sup>a</sup>      | AY787891 |          |          |              | Leclère et al. (2007)         |
| Aglaopheniidae  | <i>Aglaophenia pluma</i>                     | DQ855916 | FJ550542 | FJ550398 | INVE38220    | Villefranche-sur-Mer, France  |
| Aglaopheniidae  | <i>Aglaophenia tubiformis</i>                | DQ855917 | FJ550543 | FJ550399 | INVE32960    | Banyuls-sur-Mer, France       |
| Aglaopheniidae  | <i>Cladocarpus integer</i>                   | FJ550512 | FJ550597 | FJ550453 | INVE48754    | Raunefjord, Norway            |
| Aglaopheniidae  | <i>Gymnangium gracilicaule</i>               | DQ855934 | FJ550585 | FJ550442 | INVE36839    | Nosy Ranj, Madagascar         |
| Aglaopheniidae  | <i>Gymnangium hians</i>                      | AY787922 | Z86122   |          | INVE32586    | Pee Pee Island, Thailand      |
| Aglaopheniidae  | <i>Lytocarpia</i> sp.                        | FJ550505 | FJ550591 | FJ550448 | INVE36828    | Sakatia, Madagascar           |
| Aglaopheniidae  | <i>Macrorhynchia philippina</i> <sup>a</sup> | DQ855937 |          |          |              | Leclère et al. (2007)         |
| Aglaopheniidae  | <i>Macrorhynchia phoenicea</i>               | DQ855935 | FJ550584 | FJ550441 | INVE36813    | Sakatia, Madagascar           |
| Aglaopheniidae  | <i>Macrorhynchia sibogae</i>                 | FJ550500 | FJ550586 | FJ550443 | INVE36832    | Nosy Ranj, Madagascar         |
| Blackfordiidae  | <i>Blackfordia virginica</i>                 | AY512516 | AF358078 | AY920800 |              | Collins et al. (2006)         |
| Bonneviellidae  | <i>Bonneviella regia</i>                     | AY789805 | AY789740 |          |              | Govindarajan et al. (2006)    |
| Bonneviellidae  | <i>Bonneviella</i> sp.2                      | AY789806 | AY789741 |          |              | Govindarajan et al. (2006)    |
| Bonneviellidae  | <i>Bonneviella</i> sp.3                      | AY789807 | AY789742 |          |              | Govindarajan et al. (2006)    |
| Bonneviellidae  | <i>Bonneviella</i> sp.4                      | AY789808 | AY789743 |          |              | Govindarajan et al. (2006)    |
| Campanulariidae | <i>Campanularia crenata</i>                  | FJ550466 |          | FJ550383 |              | Wellington, New Zealand       |
| Campanulariidae | <i>Campanularia hincksii</i>                 | AY789794 | AY789729 |          |              | Govindarajan et al. (2006)    |
| Campanulariidae | <i>Campanularia volubilis</i>                | AY789804 | AY789739 |          |              | Govindarajan et al. (2006)    |
| Campanulariidae | <i>Clytia elsaeoswaldae</i>                  | DQ064793 | DQ064796 |          |              | Govindarajan et al. (2006)    |
| Campanulariidae | <i>Clytia gracilis</i>                       | AY789811 | AY789750 |          |              | Govindarajan et al. (2006)    |
| Campanulariidae | <i>Clytia hemisphaerica</i>                  |          | FJ550601 | FJ550457 |              | Villefranche-sur-mer, France  |
| Campanulariidae | <i>C. hemisphaerica</i> <sup>a</sup>         | AY789814 | AY789753 |          |              | Govindarajan et al. (2006)    |
| Campanulariidae | <i>Clytia hummelincki</i>                    | AY789809 | AY789744 |          |              | Govindarajan et al. (2006)    |
| Campanulariidae | <i>Clytia linearis</i>                       | AY789810 | AY789748 |          |              | Govindarajan et al. (2006)    |
| Campanulariidae | <i>Clytia noliformis</i>                     | DQ064792 | DQ064795 |          |              | Govindarajan et al. (2006)    |
| Campanulariidae | <i>Clytia paulensis</i>                      | AY346361 | AY789746 |          |              | Govindarajan et al. (2006)    |
| Campanulariidae | <i>Clytia</i> sp.                            | AY800195 | AF358074 |          |              | Govindarajan et al. (2006)    |
| Campanulariidae | <i>Gonothyrea loveni</i>                     | FJ550480 | FJ550547 | FJ550404 | INVE29034    | Sandgerdi, Iceland            |
| Campanulariidae | <i>G. loveni</i> <sup>a</sup>                | AY789826 | AY789765 |          |              | Govindarajan et al. (2006)    |
| Campanulariidae | <i>Laomedea calceolifera</i>                 | FJ550504 | FJ550590 | FJ550447 | INVE37296    | Herquemoulin, France          |
| Campanulariidae | <i>L. calceolifera</i> <sup>a</sup>          | AY789829 | AY789768 |          |              | Govindarajan et al. (2006)    |
| Campanulariidae | <i>Laomedea flexuosa</i>                     | AY789823 | AY789762 |          |              | Govindarajan et al. (2006)    |
| Campanulariidae | <i>Laomedea inornata</i>                     | AY789822 | AY789761 |          |              | Govindarajan et al. (2006)    |
| Campanulariidae | <i>Obelia bidentata</i>                      | FJ550503 | FJ550589 | FJ550446 | INVE37294    | Utah Beach, France            |
| Campanulariidae | <i>O. bidentata</i> <sup>a</sup>             | AY789815 | AY789754 |          |              | Govindarajan et al. (2006)    |
| Campanulariidae | <i>Obelia dichotoma</i>                      | AY789828 | AY789767 |          |              | Govindarajan et al. (2006)    |
| Campanulariidae | <i>Obelia geniculata</i>                     | FJ550481 | FJ550548 | FJ550405 |              | Sandgerdi, Iceland            |
| Campanulariidae | <i>O. geniculata</i> <sup>a</sup>            | AY530359 | AY789769 |          |              | Govindarajan et al. (2006)    |
| Campanulariidae | <i>Obelia longissima</i>                     | AY789821 | AY789760 |          |              | Govindarajan et al. (2006)    |
| Campanulariidae | <i>Obelia</i> sp. <sup>a</sup>               |          | Z86108   |          |              | Collins et al. (2006)         |
| Campanulariidae | <i>Orthopyxis everta</i>                     | AY789793 | AY789728 |          |              | Govindarajan et al. (2006)    |
| Campanulariidae | <i>Orthopyxis integra</i>                    | AY789802 | AY789737 |          |              | Govindarajan et al. (2006)    |
| Campanulariidae | <i>Orthopyxis sargassicola</i>               | AY789795 | AY789730 |          |              | Govindarajan et al. (2006)    |
| Campanulariidae | <i>Rhizocaulus verticillatus</i>             | AY789803 | AY789738 |          |              | Govindarajan et al. (2006)    |
| Campanulariidae | <i>Silicularia rosea</i>                     | FJ550482 | FJ550549 | FJ550406 | INVE25072    | Wellington, New Zealand       |
| Campanulariidae | <i>S. rosea</i> <sup>a</sup>                 | AY789792 | AY789727 |          |              | Govindarajan et al. (2006)    |
| Campanulinidae  | <i>Billardia subrufa</i> <sup>a</sup>        |          | AY789779 |          |              | Govindarajan et al. (2006)    |
| Campanulinidae  | <i>Calycella syringa</i>                     | FJ550460 | FJ550519 | FJ550372 |              | Roscoff, France               |
| Campanulinidae  | <i>C. syringa</i> <sup>a</sup>               | AY789833 | AY789776 |          |              | Govindarajan et al. (2006)    |
| Campanulinidae  | <i>Campanulina panicula</i>                  | FJ550511 | FJ550596 | FJ550452 | INVE48748    | Korsfjord, Norway             |
| Campanulinidae  | <i>Opercularella lacerata</i>                | FJ550509 | FJ550594 |          | INVE48734    | Raunefjord, Norway            |
| Campanulinidae  | <i>Opercularella pumila</i>                  | AY789834 | AY789777 |          |              | Govindarajan et al. (2006)    |
| Campanulinidae  | <i>Stegella lobata</i> <sup>a</sup>          |          | AY789778 |          |              | Govindarajan et al. (2006)    |
| Eirenidae       | <i>Eirene viridula</i>                       | FJ550502 | FJ550588 | FJ550445 |              | Luc-sur-mer, France           |
| Eirenidae       | <i>Eugymnanthea inquilina</i>                | AY789832 | AY789775 |          |              | Govindarajan et al. (2006)    |
| Eirenidae       | <i>Eutima curva</i>                          | FJ550514 | FJ550599 | FJ550455 | INVE33468    | Devonport, New Zealand        |
| Eirenidae       | <i>Eutima gegenbauri</i>                     | FJ550515 | FJ550600 | FJ550456 | INVE31748    | Villefranche sur mer, France  |
| Haleciidae      | <i>Halecium beanii</i> <sup>a</sup>          | FJ550477 |          | FJ550400 | INVE32968    | Banyuls-sur-Mer, France       |
| Haleciidae      | <i>H. beanii</i>                             | FJ550488 | FJ550560 | FJ550417 | INVE34009    | Simons Town, South Africa     |
| Haleciidae      | <i>Halecium halecinum</i> <sup>a</sup>       | FJ550463 |          |          | INVE26671    | Roscoff, France               |
| Haleciidae      | <i>Halecium labrosum</i>                     | AY787916 | FJ550550 | FJ550407 | INVE29030    | Gardur, Iceland               |
| Haleciidae      | <i>Halecium lenticulare</i>                  | FJ550469 | FJ550532 | FJ550387 | INVE33461    | Wellington, New Zealand       |
| Haleciidae      | <i>Halecium mediterraneum</i>                | FJ550492 | FJ550566 | FJ550423 | INVE34437    | Calanque Port d'Alon, France  |
| Haleciidae      | <i>Halecium muricatum</i>                    | AY787915 | FJ550551 | FJ550408 | INVE29028    | Gardur, Iceland               |
| Haleciidae      | <i>Halecium pusillum</i>                     | FJ550499 | FJ550580 | FJ550437 | INVE36295    | Roscoff, France               |
| Haleciidae      | <i>Hydrodendron gardineri</i> <sup>a</sup>   | AY787923 |          |          |              | Leclère et al. (2007)         |
| Haleciidae      | <i>Hydrodendron mirabile</i>                 | DQ855933 | FJ550568 | FJ550425 | INVE34779    | Cantabria, Noja, Spain        |
| Halopterididae  | <i>Antennella ansini</i>                     | FJ550470 | FJ550533 | FJ550388 | INVE32157    | Mallorca, Spain               |
| Halopterididae  | <i>Antennella kiwiana</i>                    | DQ855918 | FJ550534 | FJ550389 | INVE33623    | Devonport, New Zealand        |

Continued.



| Order/family      | Species                                               | 16S      | 18S      | 28S      | Voucher MHNG | Geographic origin/reference  |
|-------------------|-------------------------------------------------------|----------|----------|----------|--------------|------------------------------|
| Halopterididae    | <i>Antennella secundaria</i>                          | DQ883445 | FJ550575 | FJ550432 | INVE32969    | Banyuls-sur-Mer, France      |
| Halopterididae    | <i>A. secundaria</i> <sup>a</sup>                     | FJ550467 |          | FJ550384 |              | Roscoff, France              |
| Halopterididae    | <i>Halopteris alternata</i> <sup>a</sup>              | DQ855939 |          |          |              | Leclère et al. (2007)        |
| Halopterididae    | <i>Halopteris carinata</i>                            | DQ855919 | FJ550576 | FJ550433 | INVE35473    | Honduras                     |
| Halopterididae    | <i>Halopteris catharina</i>                           | DQ855920 | FJ550517 | FJ550370 |              | Roscoff, France              |
| Halopterididae    | <i>Halopteris diaphana</i>                            | DQ855921 | FJ550525 | FJ550378 | INVE30116    | Mallorca, Spain              |
| Halopterididae    | <i>Halopteris liechtensternii</i>                     |          | FJ550526 | FJ550379 | INVE30116    | Mallorca, Spain              |
| Halopterididae    | <i>Halopteris minuta</i> <sup>a</sup>                 | AY787912 |          |          |              | Leclère et al. (2007)        |
| Halopterididae    | <i>Halopteris polymorpha</i> <sup>a</sup>             | DQ855922 |          |          | INVE30117    | Banyuls-sur-Mer, France      |
| Halopterididae    | <i>Halopteris schucherti</i>                          |          | FJ550577 | FJ550434 | INVE35930    | Punta Huinay, Chile          |
| Halopterididae    | <i>Halopteris tenella</i> <sup>a</sup>                | DQ855938 |          |          |              | Leclère et al. (2007)        |
| Halopterididae    | <i>Monostaechas quadridens</i> <sup>a</sup>           | DQ855941 |          |          |              | Leclère et al. (2007)        |
| Hebellidae        | <i>Anthohebella parasitica</i>                        | AY787918 | EU272603 | EU272545 | INVE29762    | Spain, Mallorca              |
| Hebellidae        | <i>Hebella venusta</i>                                | FJ550496 | FJ550574 | FJ550431 | INVE35476    | Honduras                     |
| Hebellidae        | <i>Scandia gigas</i> <sup>a</sup>                     | AY787919 |          |          |              | Leclère et al. (2007)        |
| Hebellidae        | <i>Staurodiscus gotoi</i>                             | FJ550472 | FJ550535 | FJ550391 | INVE33467    | Devonport, New Zealand       |
| Kirchenpaueriidae | <i>Kirchenpaueria halecioides</i>                     | AY787895 | FJ550530 | FJ550385 | INVE29766    | Banyuls-sur-Mer, France      |
| Kirchenpaueriidae | <i>Kirchenpaueria pinnata</i>                         | FJ550497 | FJ550578 | FJ550435 | INVE36294    | Roscoff, France              |
| Kirchenpaueriidae | <i>Kirchenpaueria similis</i>                         | DQ855923 | FJ550581 | FJ550438 | INVE36296    | Roscoff, France              |
| Kirchenpaueriidae | <i>Pycnotheca mirabilis</i>                           | FJ550465 | FJ550529 | FJ550382 | INVE25847    | Wellington, New Zealand      |
| Lafoeidae         | <i>Lafoea dumosa</i>                                  | AY787917 |          | EU305520 |              | Govindarajan et al. (2006)   |
| Laodiceidae       | <i>Laodicea undulata</i>                              | FJ550471 |          | FJ550390 | INVE31753    | Villefranche sur mer, France |
| Laodiceidae       | <i>Melicertissa</i> sp.                               | AY512515 | AF358075 | AY920798 |              | Collins et al. (2006)        |
| Lovenellidae      | <i>Eucheilota bakeri</i>                              | AY789831 | AY789774 |          |              | Govindarajan et al. (2006)   |
| Lovenellidae      | <i>Eucheilota maculata</i>                            | FJ550501 | FJ550587 | FJ550444 |              | Luc-sur-mer, France          |
| Lovenellidae      | <i>Eucheilota menoni</i>                              | FJ550493 | FJ550570 | FJ550427 | INVE33457    | Motutapu Island, New Zealand |
| Lovenellidae      | <i>Hydranthea margarica</i>                           | DQ855932 | FJ550567 | FJ550424 |              | Las Negras, Andalusia, Spain |
| Lovenellidae      | <i>Lovenella gracilis</i>                             | AY789830 | AY789773 |          |              | Govindarajan et al. (2006)   |
| Malagazziidae     | <i>Octophialucium indicum</i>                         |          | FJ550522 | FJ550375 | INVE29970    | Wellington, New Zealand      |
| Melicertidae      | <i>Melicertum octocostatum</i>                        | FJ550510 | FJ550595 | FJ550451 | INVE48744    | Raunefjord, Norway           |
| Melicertidae      | <i>M. octocostatum</i> <sup>a</sup>                   | EU305479 | AY920757 | EU272575 |              | Collins et al. (2006)        |
| Mitrocomidae      | <i>Mitrocomella brownei</i>                           |          | FJ550521 | FJ550374 |              | Roscoff, France              |
| Mitrocomidae      | <i>Mitrocomella niwai</i>                             | FJ550473 | FJ550536 | FJ550392 |              | Devonport, New Zealand       |
| Mitrocomidae      | <i>Tiaropsidium kelseyi</i>                           | AY512517 | AF358079 | EU305537 |              | Collins et al. (2006)        |
| Mitrocomidae      | <i>Tiaropsis multicirrata</i>                         | FJ550468 | FJ550531 | FJ550386 |              | Sandgerdi, Iceland           |
| Phialellidae      | <i>Phialella quadrata</i>                             | FJ550474 | FJ550537 | FJ550393 | INVE33466    | Whangaparaoa, New Zealand    |
| Plumulariidae     | <i>Dentitheca bidentata</i> <sup>a</sup>              | DQ855942 |          |          |              | Leclère et al. (2007)        |
| Plumulariidae     | <i>Nemertesia antennina</i>                           | FJ550458 | FJ550516 | FJ550369 |              | Roscoff, France              |
| Plumulariidae     | <i>Nemertesia perrieri</i> <sup>a</sup>               | DQ855925 |          |          | INVE32971    | Banyuls-sur-Mer, France      |
| Plumulariidae     | <i>Plumularia cf lagenifera</i>                       | FJ550491 | FJ550564 | FJ550421 | INVE34019    | Simons Town, South Africa    |
| Plumulariidae     | <i>Plumularia filicaulis</i>                          | DQ855926 | FJ550565 | FJ550422 | INVE34020    | Simons Town, South Africa    |
| Plumulariidae     | <i>Plumularia habereri</i>                            | DQ855927 | FJ550571 | FJ550428 |              | Bunaken Island, Indonesia    |
| Plumulariidae     | <i>Plumularia hyalina</i>                             | AY787913 | FJ550552 | FJ550409 | INVE25333    | Goat Island, New Zealand     |
| Plumulariidae     | <i>Plumularia lagenifera</i>                          | DQ855928 | FJ550527 | FJ550380 | INVE25120    | Friday Harbour, USA          |
| Plumulariidae     | <i>Plumularia margareta</i>                           | FJ550483 | FJ550553 | FJ550410 | INVE29760    | Mallorca, Spain              |
| Plumulariidae     | <i>Plumularia obliqua</i>                             | DQ855929 | FJ550544 | FJ550401 |              | Banyuls-sur-Mer, France      |
| Plumulariidae     | <i>Plumularia pulchella</i>                           | DQ855930 | FJ550562 | FJ550419 | INVE34016    | Simons Town, South Africa    |
| Plumulariidae     | <i>Plumularia setacea</i>                             | FJ550459 | FJ550518 | FJ550371 |              | Roscoff, France              |
| Plumulariidae     | <i>Plumularia setaceoides</i>                         | DQ855931 | FJ550538 | FJ550394 | INVE33460    | Wellington, New Zealand      |
| Plumulariidae     | <i>Plumularia spiralis</i>                            | AY787920 | FJ550569 | FJ550426 | INVE32600    | Koh Bida Nok, Thailand       |
| Plumulariidae     | <i>Plumularia strictocarpa</i> <sup>a</sup>           | DQ855940 |          |          |              | Leclère et al. (2007)        |
| Sertulariidae     | <i>Abietinaria abietina</i>                           | FJ550484 | FJ550554 | FJ550411 | INVE29946    | Gardur, Iceland              |
| Sertulariidae     | <i>Abietinaria filicula</i>                           | FJ550485 | FJ550555 | FJ550412 | INVE29947    | Gardur, Iceland              |
| Sertulariidae     | <i>Amphisbetia minima</i>                             | FJ550486 | FJ550556 | FJ550413 | INVE25071    | Devonport, New Zealand       |
| Sertulariidae     | <i>Amphisbetia operculata</i>                         | FJ550489 | FJ550561 | FJ550418 | INVE34014    | Simons Town, South Africa    |
| Sertulariidae     | <i>Diphasia fallax</i>                                | AY787901 | FJ550557 | FJ550414 | INVE29950    | Gardur, Iceland              |
| Sertulariidae     | <i>Dynamena moluccana</i>                             | FJ550494 | FJ550572 | FJ550429 |              | Bunaken Island, Indonesia    |
| Sertulariidae     | <i>Dynamena pumila</i>                                | AY787902 | FJ550558 | FJ550415 | INVE29026    | Sandgerdi, Iceland           |
| Sertulariidae     | <i>Hydrallmania falcata</i>                           | FJ550487 | FJ550559 | FJ550416 | INVE29948    | Gardur, Iceland              |
| Sertulariidae     | <i>Salacia desmoides</i>                              | FJ550464 | FJ550528 | FJ550381 |              | Banyuls-sur-Mer, France      |
| Sertulariidae     | <i>Selaginopsis cornigera</i> <sup>a</sup>            |          | Z92899   |          |              | Collins et al. (2006)        |
| Sertulariidae     | <i>Sertularella africana</i>                          | FJ550490 | FJ550563 | FJ550420 | INVE34017    | Simons Town, South Africa    |
| Sertulariidae     | <i>Sertularella ellisii</i>                           | FJ550478 | FJ550545 | FJ550402 | INVE32156    | Mallorca, Spain              |
| Sertulariidae     | <i>Sertularella gayi</i>                              |          | FJ550579 | FJ550436 | INVE36302    | Roscoff, France              |
| Sertulariidae     | <i>Sertularella mediterranea</i>                      | FJ550479 | FJ550546 | FJ550403 | INVE32948    | Banyuls-sur-Mer, France      |
| Sertulariidae     | <i>Sertularella rugosa</i> <sup>a</sup>               | AY787906 |          |          |              | Leclère et al. (2007)        |
| Sertulariidae     | <i>Sertularia argentea</i>                            | FJ550461 | FJ550520 | FJ550373 |              | Roscoff, France              |
| Sertulariidae     | <i>Sertularia cupressina</i>                          | FJ550475 | FJ550539 | FJ550395 | INVE29949    | Gardur, Iceland              |
| Sertulariidae     | <i>Symplectoscyphus tricuspispidatus</i> <sup>a</sup> | AY787907 |          |          |              | Leclère et al. (2007)        |
| Sertulariidae     | <i>Symplectoscyphus turgidus</i>                      | FJ550462 | FJ550524 | FJ550377 | INVE29467    | California, USA              |
| Sertulariidae     | <i>Thuaria thuja</i>                                  | AY787908 | EU305503 | EU305536 |              | Collins et al. (2006)        |
| Thyroscyphidae    | <i>Thyroscyphus marginatus</i>                        | FJ550495 | FJ550573 | FJ550430 | INVE35477    | Honduras                     |
| Tiarannidae       | <i>Modeeria rotunda</i>                               | FJ550476 | FJ550540 | FJ550396 | INVE32967    | Banyuls-sur-Mer, France      |
| Tiarannidae       | <i>Stegopoma plicatile</i>                            | FJ550513 | FJ550598 | FJ550454 | INVE48755    | Raunefjord, Norway           |

Note: MHNG = Muséum d'Histoire Naturelle de Genève. Taxa with geographic origin indicated are new samples obtained for this study.

<sup>a</sup>Sample not included in the combined data set.
